# Supplementary material for: Assessment of hydrogen bond strengths and cooperativity in self- and cross-associating cyclic (HF)m(H2O)n(m+n= 2 to 8) clusters
Source: Royal Society of Chemistry journal article supplement (doi:10.1039/d1nj05431g), 2021-12-27
Supplement: d1nj05431g1.pdf [file d1nj05431g1.pdf]

## Supplementary Information

Assessment of Hydrogen Bond Strength and Cooperativity in Self- and Cross-  
Associating Cyclic  $(\text{HF})_m(\text{H}_2\text{O})_n$ ,  $(m + n) = 2$  to 8 Clusters

Deepak Patkar,<sup>†</sup> Mini Bharati Ahirwar,<sup>†</sup> Satya Prakash Shrivastava<sup>†</sup> and Milind M.  
Deshmukh<sup>†\*</sup>

<sup>†</sup>Department of Chemistry, Dr. Harisingh Gour Vishwavidyalaya, (A Central University),  
Sagar, 470003, India.

---

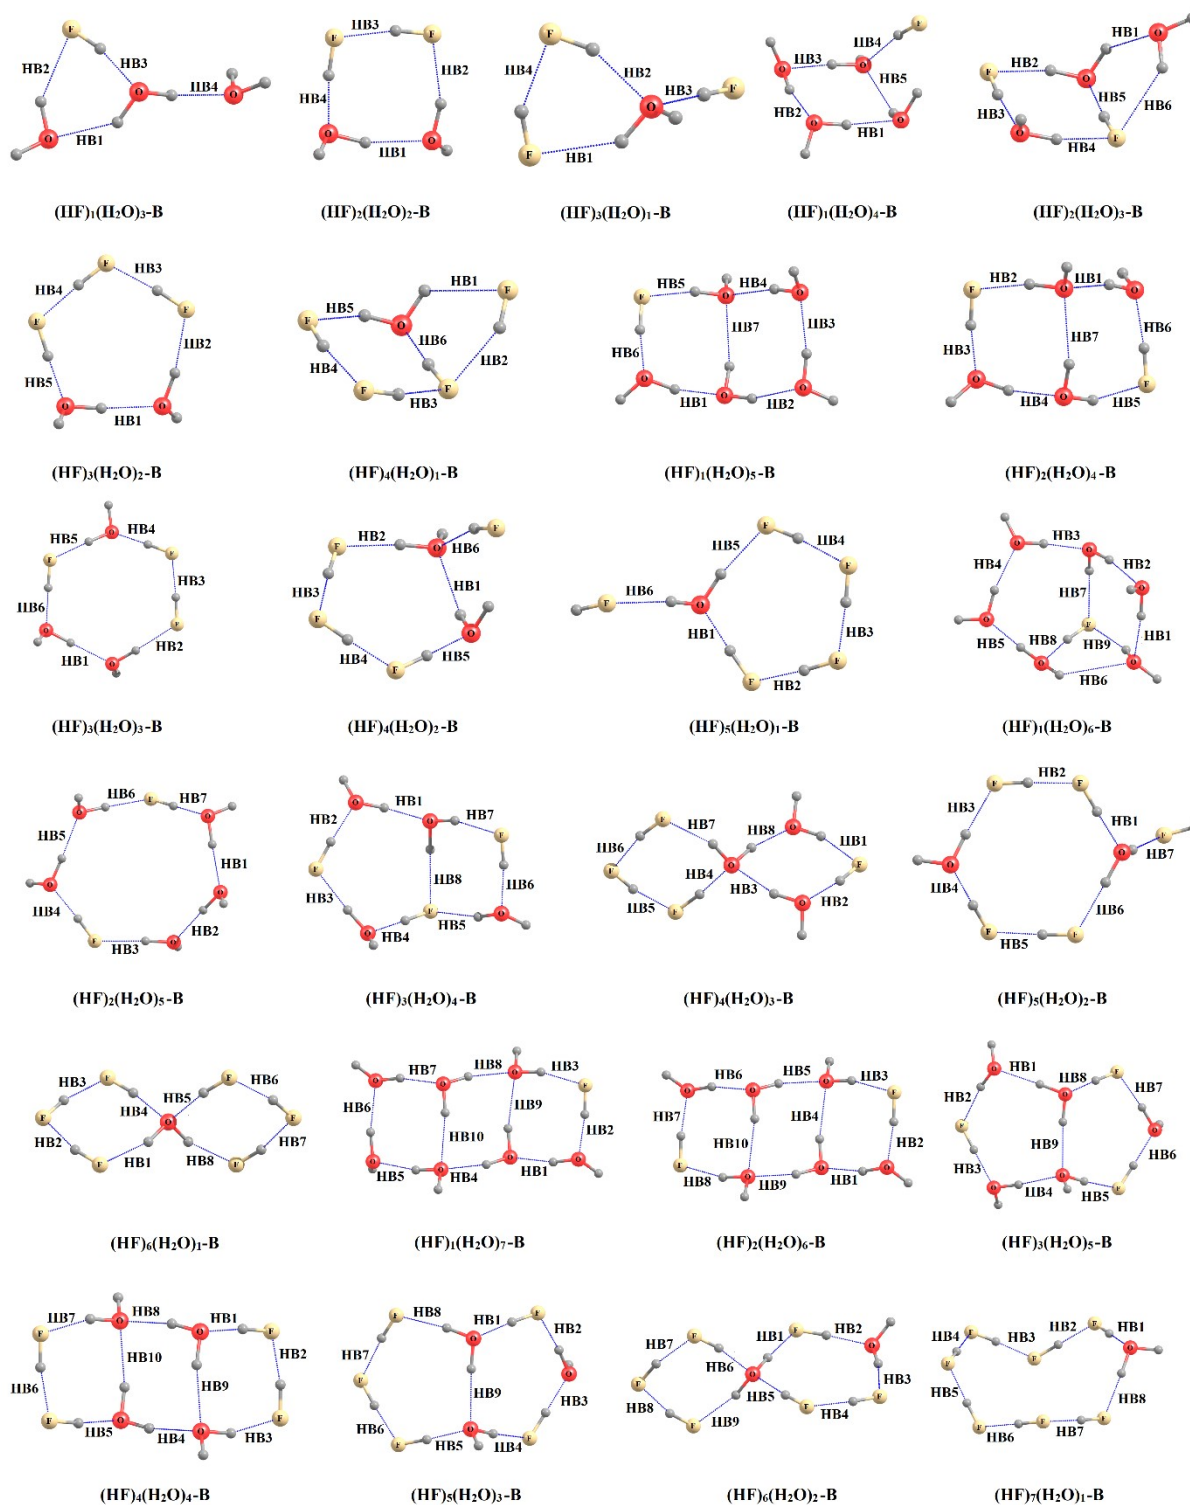

**Figure S1:** The MP2/aVDZ-optimized geometries of cyclic (HF)<sub>m</sub>(H<sub>2</sub>O)<sub>n</sub>-B ( $m + n = 4$  to  $8$ ) clusters.

**Table S1:** Molecular energies (in a.u.) of various species in the estimation of HB energy  $E_{\text{HB1}}$  in cyclic  $(\text{HF})_2(\text{H}_2\text{O})_2$ -A cluster, calculated at MP2/aug-cc-pvTZ level of theory. See text for details.

| Species                                  | Uncorrected                         | ZPE                                 | BSSE                                |
|------------------------------------------|-------------------------------------|-------------------------------------|-------------------------------------|
|                                          | Energy (in a.u.)                    | Corrected                           | Corrected                           |
| $(\text{HF})_2(\text{H}_2\text{O})_2$ -A | $E_{\text{M}} = -353.392688$        | $E_{\text{M}} = -353.317646$        | $E_{\text{M}} = -353.392688$        |
| Fragment F1                              | $E_{\text{F1}} = -277.030417$       | $E_{\text{F2}} = -276.981151$       | $E_{\text{F2}} = -277.031373$       |
| Fragment F2                              | $E_{\text{F2}} = -253.021536$       | $E_{\text{F1}} = -252.960427$       | $E_{\text{F1}} = -253.022523$       |
| Fragment F3                              | $E_{\text{F3}} = -176.682423$       | $E_{\text{F3}} = -176.646681$       | $E_{\text{F3}} = -176.683281$       |
| HF1...W1 dimer                           | $E_{\text{HF1...W1}} = -176.682423$ | $E_{\text{HF1...W1}} = -176.646681$ | $E_{\text{HF1...W1}} = -176.683281$ |
| HF1 monomer                              | $E_{\text{HF1}} = -100.338637$      | $E_{\text{HF1}} = -100.330753$      | $E_{\text{HF1}} = -100.339643$      |
| W1 monomer                               | $E_{\text{W1}} = -76.328570$        | $E_{\text{W1}} = -76.307814$        | $E_{\text{W1}} = -76.329601$        |

**Table S2:** The individual F-H...O HB energies (kcal/mol), distances (in Å) and angles (degrees), in cyclic (HF)<sub>m</sub>(H<sub>2</sub>O)<sub>n</sub>-B clusters calculated at MP2/aVTZ level, along with the respective cooperativity contribution (kcal/mol). See Figures S1 and text for details.

| <b>Conformer B</b>                                | <b>HB Label</b> | <b>HB Distances</b> | <b>HB Angles</b> | <b>HB energy by MTA</b> | <b>HB energy in Dimer</b> | <b>Cooperativity</b> |
|---------------------------------------------------|-----------------|---------------------|------------------|-------------------------|---------------------------|----------------------|
| (HF) <sub>1</sub> (H <sub>2</sub> O) <sub>3</sub> | HB3             | 1.57                | 167              | 13.9                    | 9.2                       | 4.7                  |
| (HF) <sub>2</sub> (H <sub>2</sub> O) <sub>2</sub> | HB4             | 1.51                | 172              | 16.7                    | 9.6                       | 7.0                  |
| (HF) <sub>3</sub> (H <sub>2</sub> O) <sub>1</sub> | HB2             | 1.72                | 155              | 10.5                    | 8.5                       | 2.0                  |
|                                                   | HB3             | 1.78                | 176              | 8.3                     | 9.1                       | -0.8                 |
| (HF) <sub>1</sub> (H <sub>2</sub> O) <sub>4</sub> | HB4             | 1.63                | 168              | 11.6                    | 9.2                       | 2.4                  |
| (HF) <sub>2</sub> (H <sub>2</sub> O) <sub>3</sub> | HB3             | 1.58                | 172              | 13.9                    | 9.6                       | 4.3                  |
|                                                   | HB5             | 1.47                | 171              | 15.5                    | 9.6                       | 5.9                  |
| (HF) <sub>3</sub> (H <sub>2</sub> O) <sub>2</sub> | HB5             | 1.46                | 178              | 19.1                    | 9.7                       | 9.4                  |
| (HF) <sub>4</sub> (H <sub>2</sub> O) <sub>1</sub> | HB6             | 1.40                | 172              | 21.6                    | 8.5                       | 13.1                 |
| (HF) <sub>1</sub> (H <sub>2</sub> O) <sub>5</sub> | HB6             | 1.45                | 171              | 17.5                    | 9.3                       | 8.2                  |
| (HF) <sub>2</sub> (H <sub>2</sub> O) <sub>4</sub> | HB3             | 1.50                | 172              | 17.0                    | 9.7                       | 7.4                  |
|                                                   | HB6             | 1.58                | 173              | 13.7                    | 9.6                       | 4.1                  |
| (HF) <sub>3</sub> (H <sub>2</sub> O) <sub>3</sub> | HB4             | 1.48                | 178              | 17.5                    | 9.6                       | 7.9                  |
|                                                   | HB6             | 1.49                | 178              | 17.2                    | 9.6                       | 7.5                  |
| (HF) <sub>4</sub> (H <sub>2</sub> O) <sub>2</sub> | HB5             | 1.47                | 177              | 18.5                    | 9.6                       | 8.9                  |
|                                                   | HB6             | 1.67                | 163              | 10.4                    | 8.8                       | 1.5                  |
| (HF) <sub>5</sub> (H <sub>2</sub> O) <sub>1</sub> | HB1             | 1.44                | 178              | 19.9                    | 9.8                       | 10.1                 |
| (HF) <sub>1</sub> (H <sub>2</sub> O) <sub>6</sub> | HB8             | 1.45                | 171              | 18.6                    | 9.7                       | 8.9                  |
| (HF) <sub>2</sub> (H <sub>2</sub> O) <sub>5</sub> | HB4             | 1.52                | 178              | 16.2                    | 9.5                       | 6.6                  |
|                                                   | HB7             | 1.51                | 178              | 16.2                    | 9.6                       | 6.6                  |
| (HF) <sub>3</sub> (H <sub>2</sub> O) <sub>4</sub> | HB2             | 1.48                | 176              | 18.0                    | 9.7                       | 8.3                  |
|                                                   | HB4             | 1.46                | 179              | 18.8                    | 9.7                       | 9.1                  |
|                                                   | HB6             | 1.59                | 172              | 13.2                    | 9.5                       | 3.7                  |
| (HF) <sub>4</sub> (H <sub>2</sub> O) <sub>3</sub> | HB2             | 1.57                | 172              | 14.0                    | 9.6                       | 4.5                  |
|                                                   | HB4             | 1.50                | 171              | 17.4                    | 9.8                       | 7.7                  |
| (HF) <sub>5</sub> (H <sub>2</sub> O) <sub>2</sub> | HB1             | 1.45                | 179              | 19.4                    | 9.6                       | 9.8                  |
|                                                   | HB4             | 1.49                | 178              | 17.3                    | 9.6                       | 7.7                  |
| (HF) <sub>6</sub> (H <sub>2</sub> O) <sub>1</sub> | HB4             | 1.60                | 169              | 14.1                    | 9.1                       | 5.0                  |
|                                                   | HB5             | 1.60                | 169              | 14.1                    | 9.6                       | 4.5                  |
| (HF) <sub>1</sub> (H <sub>2</sub> O) <sub>7</sub> | HB2             | 1.52                | 172              | 16.2                    | 9.7                       | 6.5                  |
| (HF) <sub>2</sub> (H <sub>2</sub> O) <sub>6</sub> | HB2             | 1.52                | 172              | 16.2                    | 9.7                       | 6.6                  |
|                                                   | HB7             | 1.52                | 172              | 16.2                    | 9.7                       | 6.6                  |
| (HF) <sub>3</sub> (H <sub>2</sub> O) <sub>5</sub> | HB3             | 1.56                | 178              | 14.5                    | 9.6                       | 5.0                  |
|                                                   | HB6             | 1.49                | 177              | 17.6                    | 9.7                       | 7.9                  |
|                                                   | HB8             | 1.45                | 178              | 19.8                    | 9.8                       | 10.0                 |
| (HF) <sub>4</sub> (H <sub>2</sub> O) <sub>4</sub> | HB1             | 1.46                | 173              | 18.8                    | 9.7                       | 9.1                  |
|                                                   | HB5             | 1.46                | 173              | 18.8                    | 9.7                       | 9.1                  |
| (HF) <sub>5</sub> (H <sub>2</sub> O) <sub>3</sub> | HB1             | 1.50                | 177              | 17.2                    | 9.6                       | 7.6                  |
|                                                   | HB3             | 1.48                | 178              | 18.3                    | 9.7                       | 8.6                  |
|                                                   | HB5             | 1.53                | 177              | 15.1                    | 9.6                       | 5.4                  |
| (HF) <sub>6</sub> (H <sub>2</sub> O) <sub>2</sub> | HB2             | 1.50                | 177              | 16.6                    | 9.6                       | 7.0                  |
|                                                   | HB5             | 1.56                | 177              | 15.2                    | 9.8                       | 5.5                  |
|                                                   | HB6             | 1.58                | 170              | 14.7                    | 9.6                       | 5.1                  |
| (HF) <sub>7</sub> (H <sub>2</sub> O) <sub>1</sub> | HB1             | 1.46                | 178              | 18.7                    | 9.6                       | 9.1                  |

**Table S3:** The individual F-H...F HB energies (kcal/mol), distances (in Å) and angles (degrees), in cyclic (HF)<sub>m</sub>(H<sub>2</sub>O)<sub>n</sub>-B clusters calculated at MP2/aVTZ level, along with the respective cooperativity contribution (kcal/mol). See Figures S1 and text for details.

| Conformers<br>B                                   | HB<br>Label | HB<br>Distance | Bond<br>Angle | HB energy<br>with MTA | HB energy<br>in Dimer | Cooperativity |
|---------------------------------------------------|-------------|----------------|---------------|-----------------------|-----------------------|---------------|
| (HF) <sub>2</sub> (H <sub>2</sub> O) <sub>2</sub> | HB3         | 1.59           | 169           | 10.4                  | 4.5                   | 5.9           |
| (HF) <sub>3</sub> (H <sub>2</sub> O) <sub>1</sub> | HB4         | 1.77           | 149           | 7.4                   | 4.3                   | 3.1           |
| (HF) <sub>3</sub> (H <sub>2</sub> O) <sub>2</sub> | HB3         | 1.58           | 175           | 10.0                  | 4.3                   | 5.7           |
|                                                   | HB4         | 1.51           | 177           | 12.7                  | 4.0                   | 8.8           |
| (HF) <sub>4</sub> (H <sub>2</sub> O) <sub>1</sub> | HB2         | 1.86           | 146           | 7.1                   | 4.6                   | 2.5           |
|                                                   | HB3         | 1.60           | 165           | 11.2                  | 4.7                   | 6.5           |
|                                                   | HB4         | 1.65           | 165           | 8.9                   | 4.6                   | 4.4           |
| (HF) <sub>3</sub> (H <sub>2</sub> O) <sub>3</sub> | HB3         | 1.56           | 178           | 11.0                  | 4.2                   | 6.8           |
| (HF) <sub>4</sub> (H <sub>2</sub> O) <sub>2</sub> | HB3         | 1.56           | 176           | 10.7                  | 4.2                   | 6.5           |
|                                                   | HB4         | 1.51           | 176           | 13.0                  | 3.9                   | 9.1           |
| (HF) <sub>5</sub> (H <sub>2</sub> O) <sub>1</sub> | HB2         | 1.49           | 176           | 13.6                  | 3.8                   | 9.8           |
|                                                   | HB3         | 1.54           | 176           | 11.3                  | 4.1                   | 7.3           |
|                                                   | HB4         | 1.59           | 174           | 9.8                   | 4.4                   | 5.4           |
| (HF) <sub>4</sub> (H <sub>2</sub> O) <sub>3</sub> | HB5         | 1.55           | 167           | 11.6                  | 4.2                   | 7.4           |
|                                                   | HB6         | 1.62           | 166           | 9.4                   | 4.5                   | 5.0           |
| (HF) <sub>5</sub> (H <sub>2</sub> O) <sub>2</sub> | HB2         | 1.52           | 178           | 12.2                  | 4.0                   | 8.3           |
|                                                   | HB5         | 1.55           | 177           | 11.1                  | 4.2                   | 6.9           |
| (HF) <sub>6</sub> (H <sub>2</sub> O) <sub>1</sub> | HB2         | 1.62           | 165           | 9.4                   | 4.4                   | 5.0           |
|                                                   | HB3         | 1.59           | 165           | 10.3                  | 3.9                   | 6.5           |
|                                                   | HB6         | 1.59           | 165           | 10.3                  | 4.4                   | 6.0           |
|                                                   | HB7         | 1.62           | 165           | 9.4                   | 4.4                   | 5.0           |
| (HF) <sub>4</sub> (H <sub>2</sub> O) <sub>4</sub> | HB2         | 1.55           | 169           | 11.6                  | 4.3                   | 7.4           |
|                                                   | HB6         | 1.55           | 169           | 11.6                  | 4.3                   | 7.4           |
| (HF) <sub>5</sub> (H <sub>2</sub> O) <sub>3</sub> | HB6         | 1.56           | 176           | 10.9                  | 4.2                   | 6.7           |
|                                                   | HB7         | 1.61           | 174           | 9.1                   | 4.5                   | 4.7           |
| (HF) <sub>6</sub> (H <sub>2</sub> O) <sub>2</sub> | HB4         | 1.58           | 174           | 10.2                  | 4.4                   | 5.8           |
|                                                   | HB7         | 1.59           | 166           | 10.5                  | 4.3                   | 6.2           |
|                                                   | HB8         | 1.62           | 165           | 9.4                   | 4.4                   | 5.0           |
| (HF) <sub>7</sub> (H <sub>2</sub> O) <sub>1</sub> | HB2         | 1.49           | 179           | 13.0                  | 3.6                   | 9.4           |
|                                                   | HB3         | 1.52           | 177           | 11.2                  | 3.7                   | 7.5           |
|                                                   | HB4         | 1.53           | 179           | 11.2                  | 3.9                   | 7.3           |
|                                                   | HB5         | 1.54           | 178           | 10.7                  | 3.9                   | 6.8           |
|                                                   | HB6         | 1.55           | 178           | 10.3                  | 4.0                   | 6.3           |
|                                                   | HB7         | 1.58           | 178           | 9.6                   | 4.2                   | 5.4           |

**Table S4:** The individual O-H...O HB energies (kcal/mol), distances (in Å) and angles (degrees), in cyclic (HF)<sub>m</sub>(H<sub>2</sub>O)<sub>n</sub>-B clusters calculated at MP2/aVTZ level, along with the respective cooperativity contribution (kcal/mol). See Figures S1 and text for details.

| Conformers<br>B                                   | HB<br>Label | HB<br>Distance | HB<br>Angle | HB energy<br>by MTA | HB energy<br>in Dimer | Cooperativity |
|---------------------------------------------------|-------------|----------------|-------------|---------------------|-----------------------|---------------|
| (HF) <sub>1</sub> (H <sub>2</sub> O) <sub>3</sub> | HB1         | 2.00           | 140         | 7.1                 | 4.6                   | 2.5           |
|                                                   | HB4         | 1.86           | 175         | 6.3                 | 5.1                   | 1.2           |
| (HF) <sub>2</sub> (H <sub>2</sub> O) <sub>2</sub> | HB1         | 1.74           | 165         | 9.4                 | 4.8                   | 4.7           |
| (HF) <sub>1</sub> (H <sub>2</sub> O) <sub>4</sub> | HB1         | 1.78           | 167         | 8.4                 | 4.9                   | 3.5           |
|                                                   | HB2         | 1.74           | 168         | 9.1                 | 4.8                   | 4.4           |
|                                                   | HB3         | 1.69           | 169         | 10.4                | 4.5                   | 5.9           |
|                                                   | HB5         | 2.10           | 144         | 7.1                 | 4.3                   | 2.8           |
| (HF) <sub>2</sub> (H <sub>2</sub> O) <sub>3</sub> | HB1         | 2.00           | 138         | 6.6                 | 4.4                   | 2.2           |
| (HF) <sub>3</sub> (H <sub>2</sub> O) <sub>2</sub> | HB1         | 1.69           | 175         | 10.1                | 4.5                   | 5.6           |
| (HF) <sub>1</sub> (H <sub>2</sub> O) <sub>5</sub> | HB1         | 1.64           | 167         | 11.2                | 4.1                   | 7.1           |
|                                                   | HB2         | 1.80           | 164         | 5.8                 | 3.5                   | 2.4           |
|                                                   | HB3         | 1.80           | 166         | 7.9                 | 5.0                   | 2.9           |
|                                                   | HB4         | 1.85           | 169         | 6.0                 | 4.5                   | 1.5           |
|                                                   | HB7         | 2.05           | 152         | 6.8                 | 4.7                   | 2.2           |
| (HF) <sub>2</sub> (H <sub>2</sub> O) <sub>4</sub> | HB1         | 1.80           | 168         | 6.2                 | 4.2                   | 2.0           |
|                                                   | HB4         | 1.68           | 168         | 10.5                | 4.5                   | 6.0           |
|                                                   | HB7         | 2.03           | 153         | 6.8                 | 4.7                   | 2.1           |
| (HF) <sub>3</sub> (H <sub>2</sub> O) <sub>3</sub> | HB1         | 1.69           | 180         | 9.8                 | 4.4                   | 5.3           |
| (HF) <sub>4</sub> (H <sub>2</sub> O) <sub>2</sub> | HB1         | 2.02           | 147         | 8.2                 | 4.2                   | 3.9           |
| (HF) <sub>1</sub> (H <sub>2</sub> O) <sub>6</sub> | HB1         | 1.87           | 164         | 6.7                 | 5.2                   | 1.6           |
|                                                   | HB2         | 1.86           | 170         | 5.4                 | 4.0                   | 1.4           |
|                                                   | HB3         | 1.70           | 174         | 9.7                 | 4.7                   | 5.0           |
|                                                   | HB4         | 1.72           | 169         | 9.1                 | 4.2                   | 4.9           |
|                                                   | HB5         | 1.67           | 178         | 10.4                | 4.3                   | 6.1           |
|                                                   | HB6         | 2.47           | 120         | 6.4                 | 3.7                   | 2.7           |
| (HF) <sub>2</sub> (H <sub>2</sub> O) <sub>5</sub> | HB1         | 1.68           | 178         | 10.3                | 4.3                   | 6.0           |
|                                                   | HB2         | 1.73           | 179         | 8.8                 | 4.5                   | 4.3           |
|                                                   | HB5         | 1.70           | 177         | 9.7                 | 4.4                   | 5.3           |
| (HF) <sub>3</sub> (H <sub>2</sub> O) <sub>4</sub> | HB1         | 1.67           | 175         | 10.6                | 4.3                   | 6.3           |
| (HF) <sub>4</sub> (H <sub>2</sub> O) <sub>3</sub> | HB3         | 1.85           | 162         | 8.7                 | 5.2                   | 3.4           |
|                                                   | HB8         | 1.68           | 167         | 9.4                 | 3.9                   | 5.5           |
| (HF) <sub>1</sub> (H <sub>2</sub> O) <sub>7</sub> | HB1         | 1.68           | 168         | 10.6                | 4.5                   | 6.2           |
|                                                   | HB4         | 1.85           | 170         | 6.6                 | 4.7                   | 1.9           |
|                                                   | HB5         | 1.72           | 169         | 9.7                 | 4.8                   | 5.0           |
|                                                   | HB6         | 1.75           | 168         | 9.2                 | 4.9                   | 4.3           |
|                                                   | HB7         | 1.73           | 169         | 9.3                 | 4.8                   | 4.5           |
|                                                   | HB8         | 1.91           | 168         | 5.9                 | 4.7                   | 1.2           |
|                                                   | HB9         | 1.94           | 159         | 7.1                 | 5.0                   | 2.1           |
|                                                   | HB10        | 1.94           | 161         | 7.1                 | 5.0                   | 2.1           |
| (HF) <sub>2</sub> (H <sub>2</sub> O) <sub>6</sub> | HB1         | 1.68           | 169         | 10.5                | 4.5                   | 6.0           |
|                                                   | HB4         | 1.95           | 158         | 7.1                 | 5.0                   | 2.1           |
|                                                   | HB5         | 1.88           | 169         | 6.2                 | 4.7                   | 1.5           |
|                                                   | HB6         | 1.68           | 169         | 10.5                | 4.5                   | 6.0           |
|                                                   | HB9         | 1.88           | 169         | 6.2                 | 4.7                   | 1.5           |
|                                                   | HB10        | 1.95           | 158         | 7.1                 | 5.0                   | 2.1           |
| (HF) <sub>3</sub> (H <sub>2</sub> O) <sub>5</sub> | HB1         | 1.74           | 177         | 7.5                 | 4.0                   | 3.5           |
|                                                   | HB4         | 1.78           | 175         | 6.4                 | 4.2                   | 2.2           |
|                                                   | HB9         | 1.89           | 173         | 7.6                 | 5.2                   | 2.3           |
| (HF) <sub>4</sub> (H <sub>2</sub> O) <sub>4</sub> | HB4         | 1.83           | 168         | 6.8                 | 4.6                   | 2.2           |
|                                                   | HB8         | 1.83           | 168         | 6.8                 | 4.6                   | 2.2           |
|                                                   | HB9         | 1.92           | 156         | 7.9                 | 4.9                   | 3.0           |
|                                                   | HB10        | 1.92           | 156         | 7.9                 | 4.9                   | 3.0           |
| (HF) <sub>5</sub> (H <sub>2</sub> O) <sub>3</sub> | HB9         | 1.94           | 173         | 7.5                 | 5.2                   | 2.3           |

**Table S5:** The individual O-H...F HB energies (kcal/mol), distances (in Å) and angles (degrees), in cyclic (HF)<sub>m</sub>(H<sub>2</sub>O)<sub>n</sub>-B clusters calculated at MP2/aVTZ level, along with the respective cooperativity contribution (kcal/mol). See Figures S1 and text for details.

| Conformer<br>B                                    | HB<br>Label | HB<br>Distance | HB<br>Angle | HB energy<br>by MTA | HB energy<br>in Dimer | Cooperativity |
|---------------------------------------------------|-------------|----------------|-------------|---------------------|-----------------------|---------------|
| (HF) <sub>1</sub> (H <sub>2</sub> O) <sub>3</sub> | HB2         | 2.01           | 144         | 6.3                 | 3.3                   | 2.9           |
| (HF) <sub>2</sub> (H <sub>2</sub> O) <sub>2</sub> | HB2         | 1.84           | 159         | 6.3                 | 2.7                   | 3.6           |
| (HF) <sub>3</sub> (H <sub>2</sub> O) <sub>1</sub> | HB1         | 1.96           | 139         | 6.7                 | 3.1                   | 3.6           |
| (HF) <sub>2</sub> (H <sub>2</sub> O) <sub>3</sub> | HB2         | 1.82           | 159         | 6.8                 | 2.4                   | 4.3           |
|                                                   | HB4         | 1.80           | 161         | 10.0                | 2.8                   | 7.2           |
|                                                   | HB6         | 2.18           | 133         | 6.2                 | 3.6                   | 2.6           |
| (HF) <sub>3</sub> (H <sub>2</sub> O) <sub>2</sub> | HB2         | 1.79           | 169         | 6.1                 | 2.3                   | 3.8           |
| (HF) <sub>4</sub> (H <sub>2</sub> O) <sub>1</sub> | HB1         | 2.35           | 119         | 6.5                 | 3.0                   | 3.5           |
|                                                   | HB5         | 1.81           | 156         | 7.0                 | 2.4                   | 4.6           |
| (HF) <sub>1</sub> (H <sub>2</sub> O) <sub>5</sub> | HB5         | 1.72           | 167         | 7.7                 | 2.1                   | 5.7           |
| (HF) <sub>2</sub> (H <sub>2</sub> O) <sub>4</sub> | HB2         | 1.72           | 166         | 7.5                 | 2.1                   | 5.5           |
|                                                   | HB5         | 1.87           | 161         | 3.2                 | 1.1                   | 2.1           |
| (HF) <sub>3</sub> (H <sub>2</sub> O) <sub>3</sub> | HB2         | 1.77           | 177         | 6.0                 | 2.0                   | 3.9           |
|                                                   | HB5         | 1.68           | 177         | 7.9                 | 1.5                   | 6.4           |
| (HF) <sub>4</sub> (H <sub>2</sub> O) <sub>2</sub> | HB2         | 1.72           | 170         | 7.0                 | 1.9                   | 5.1           |
| (HF) <sub>5</sub> (H <sub>2</sub> O) <sub>1</sub> | HB5         | 1.76           | 170         | 6.7                 | 2.2                   | 4.5           |
|                                                   | HB6         | 1.92           | 170         | 3.7                 | 2.7                   | 1.0           |
| (HF) <sub>1</sub> (H <sub>2</sub> O) <sub>6</sub> | HB7         | 1.97           | 161         | 5.0                 | 2.6                   | 2.4           |
|                                                   | HB9         | 1.86           | 152         | 5.8                 | 2.8                   | 3.0           |
| (HF) <sub>2</sub> (H <sub>2</sub> O) <sub>5</sub> | HB3         | 1.75           | 178         | 6.4                 | 1.9                   | 4.5           |
|                                                   | HB6         | 1.74           | 178         | 5.8                 | 1.5                   | 4.4           |
| (HF) <sub>3</sub> (H <sub>2</sub> O) <sub>4</sub> | HB3         | 1.66           | 177         | 8.5                 | 1.2                   | 7.3           |
|                                                   | HB5         | 1.77           | 164         | 5.6                 | 2.2                   | 3.4           |
|                                                   | HB7         | 1.86           | 165         | 2.9                 | 1.0                   | 1.8           |
|                                                   | HB8         | 1.97           | 162         | 5.9                 | 2.8                   | 3.1           |
| (HF) <sub>4</sub> (H <sub>2</sub> O) <sub>3</sub> | HB1         | 1.79           | 161         | 6.9                 | 2.6                   | 4.3           |
|                                                   | HB7         | 1.81           | 159         | 6.9                 | 2.6                   | 4.3           |
| (HF) <sub>5</sub> (H <sub>2</sub> O) <sub>2</sub> | HB3         | 1.71           | 176         | 7.1                 | 1.7                   | 5.4           |
|                                                   | HB6         | 1.74           | 178         | 6.4                 | 1.7                   | 4.7           |
|                                                   | HB7         | 1.94           | 166         | 3.7                 | 2.8                   | 0.9           |
| (HF) <sub>6</sub> (H <sub>2</sub> O) <sub>1</sub> | HB1         | 1.74           | 161         | 7.3                 | 2.1                   | 5.2           |
|                                                   | HB8         | 1.74           | 161         | 7.3                 | 2.1                   | 5.2           |
| (HF) <sub>1</sub> (H <sub>2</sub> O) <sub>7</sub> | HB3         | 1.75           | 165         | 7.3                 | 2.3                   | 4.9           |
| (HF) <sub>2</sub> (H <sub>2</sub> O) <sub>6</sub> | HB3         | 1.75           | 165         | 7.3                 | 2.3                   | 5.1           |
|                                                   | HB8         | 1.75           | 165         | 7.3                 | 2.1                   | 5.2           |
| (HF) <sub>3</sub> (H <sub>2</sub> O) <sub>5</sub> | HB2         | 1.79           | 170         | 6.3                 | 2.4                   | 3.8           |
|                                                   | HB5         | 1.68           | 174         | 7.4                 | 1.5                   | 5.9           |
|                                                   | HB7         | 1.66           | 175         | 8.9                 | 1.3                   | 7.6           |
| (HF) <sub>4</sub> (H <sub>2</sub> O) <sub>4</sub> | HB3         | 1.76           | 162         | 7.0                 | 2.3                   | 4.7           |
|                                                   | HB7         | 1.76           | 162         | 7.0                 | 2.3                   | 4.7           |
| (HF) <sub>5</sub> (H <sub>2</sub> O) <sub>3</sub> | HB2         | 1.67           | 174         | 8.3                 | 1.5                   | 6.9           |
|                                                   | HB4         | 1.62           | 176         | 8.7                 | 0.7                   | 8.0           |
|                                                   | HB8         | 1.81           | 173         | 3.9                 | 1.3                   | 2.6           |
| (HF) <sub>6</sub> (H <sub>2</sub> O) <sub>2</sub> | HB1         | 1.64           | 174         | 8.4                 | 1.0                   | 7.4           |
|                                                   | HB3         | 1.75           | 170         | 6.8                 | 2.1                   | 4.7           |
|                                                   | HB9         | 1.75           | 161         | 7.1                 | 2.2                   | 5.0           |
| (HF) <sub>7</sub> (H <sub>2</sub> O) <sub>1</sub> | HB8         | 1.72           | 177         | 6.5                 | 1.7                   | 4.7           |

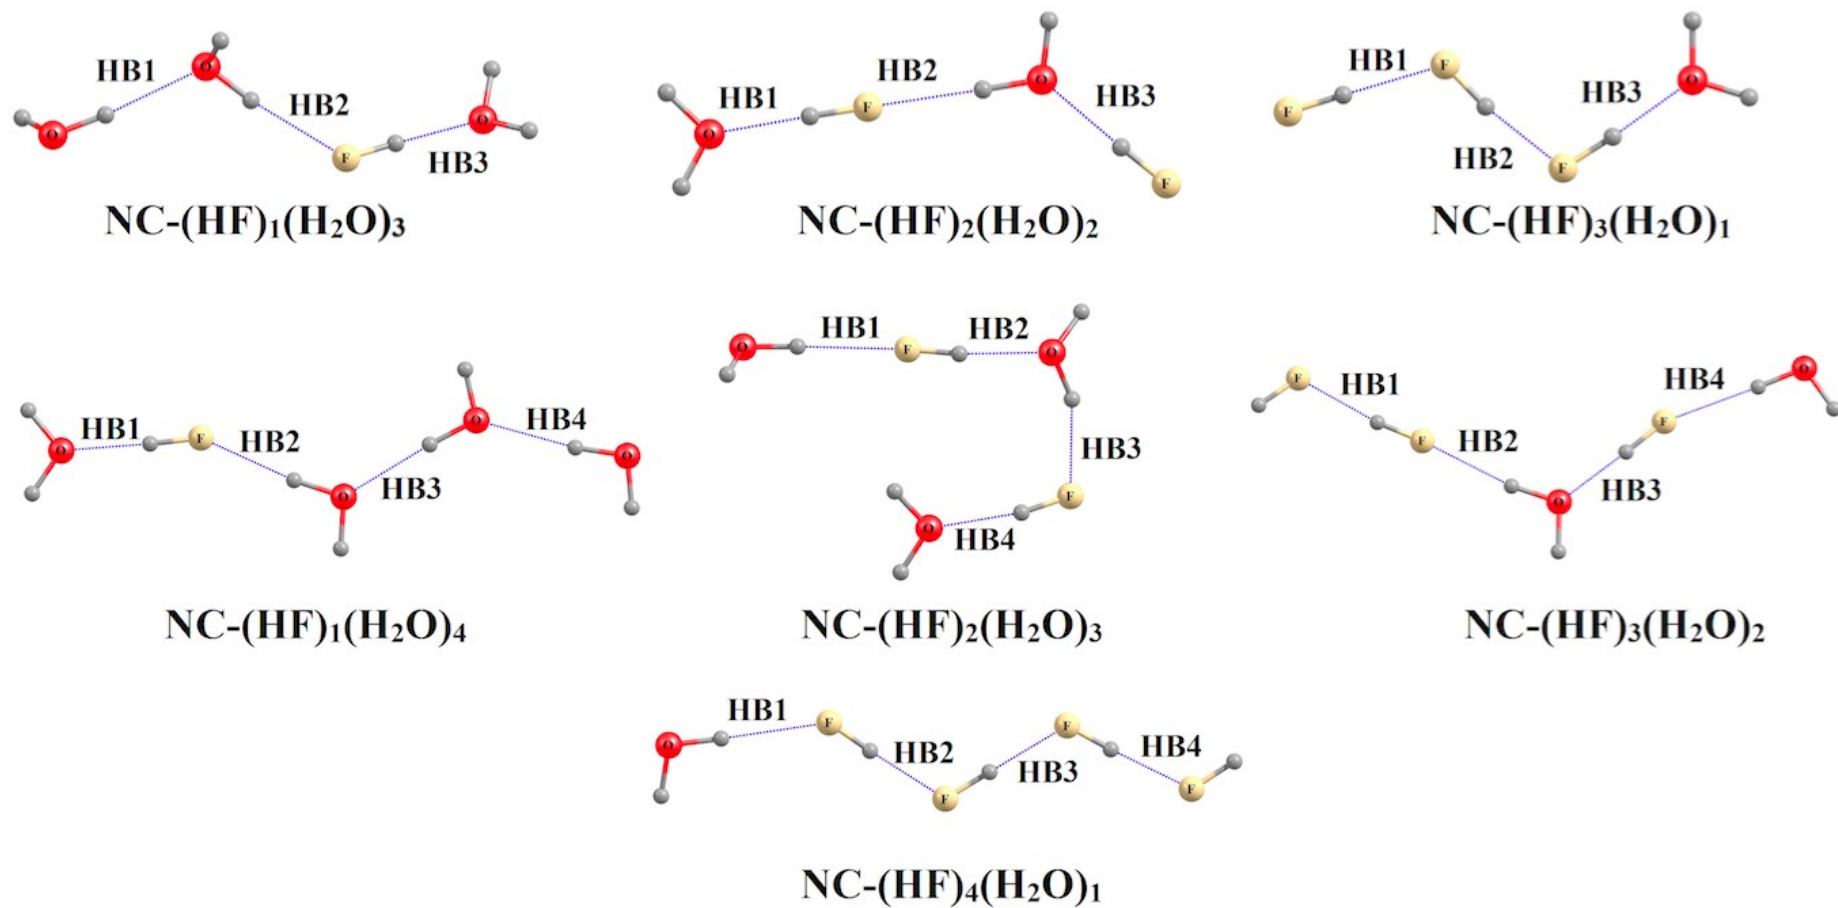

**Figure S2:** The MP2/aVDZ optimized geometries of linear non-cyclic  $\text{NC}-(\text{HF})_m(\text{H}_2\text{O})_n$  ( $m + n = 4$  and  $5$ ) clusters.



**Table S6:** The ZPE- and BSSE-corrected HB energies at MP2/aVTZ level of theory in some linear non-cyclic NC-(HF)<sub>m</sub>(H<sub>2</sub>O)<sub>n</sub> (m + n=4 and 5) clusters.

| H-bond label                                              | HB Energy | ZPE-corrected HB Energy | BSSE-corrected HB Energy |
|-----------------------------------------------------------|-----------|-------------------------|--------------------------|
| <b>NC-(HF)<sub>1</sub>(H<sub>2</sub>O)<sub>3</sub></b>    |           |                         |                          |
| HB1                                                       | 5.88      | 5.10                    | 5.39                     |
| HB2                                                       | 4.26      | 3.85                    | 3.84                     |
| HB3                                                       | 10.85     | 10.36                   | 10.23                    |
| <b>NC-(HF)<sub>2</sub>(H<sub>2</sub>O)<sub>2</sub></b>    |           |                         |                          |
| HB1                                                       | 10.83     | 10.51                   | 10.26                    |
| HB2                                                       | 4.37      | 4.57                    | 3.98                     |
| HB3                                                       | 10.15     | 9.51                    | 9.60                     |
| <b>NC-(HF)<sub>3</sub>(H<sub>2</sub>O)<sub>1</sub> -A</b> |           |                         |                          |
| HB1                                                       | 6.53      | 6.31                    | 5.98                     |
| HB2                                                       | 8.63      | 8.41                    | 8.02                     |
| HB3                                                       | 12.05     | 12.22                   | 11.46                    |
| <b>NC-(HF)<sub>1</sub>(H<sub>2</sub>O)<sub>4</sub></b>    |           |                         |                          |
| HB1                                                       | 10.68     | 9.88                    | 10.10                    |
| HB2                                                       | 4.11      | 3.63                    | 3.61                     |
| HB3                                                       | 1.60      | 1.84                    | 1.57                     |
| HB4                                                       | 5.68      | 5.15                    | 5.24                     |
| <b>NC-(HF)<sub>2</sub>(H<sub>2</sub>O)<sub>3</sub></b>    |           |                         |                          |
| HB1                                                       | 3.49      | 3.26                    | 3.15                     |
| HB2                                                       | 12.48     | 11.76                   | 11.87                    |
| HB3                                                       | 5.73      | 5.21                    | 5.29                     |
| HB4                                                       | 10.87     | 10.39                   | 10.36                    |
| <b>NC-(HF)<sub>3</sub>(H<sub>2</sub>O)<sub>2</sub></b>    |           |                         |                          |
| HB1                                                       | 5.65      | 5.25                    | 5.11                     |
| HB2                                                       | 3.81      | 3.61                    | 3.43                     |
| HB3                                                       | 11.38     | 10.75                   | 10.78                    |
| HB4                                                       | 3.56      | 3.50                    | 3.18                     |
| <b>NC-(HF)<sub>4</sub>(H<sub>2</sub>O)<sub>1</sub></b>    |           |                         |                          |
| HB1                                                       | 3.08      | 2.68                    | 2.70                     |
| HB2                                                       | 6.98      | 6.42                    | 6.42                     |
| HB3                                                       | 7.34      | 6.95                    | 6.85                     |
| HB4                                                       | 6.28      | 5.84                    | 5.73                     |

**Note:** The energies of different types of respective HBs are much smaller in the linear non-cyclic clusters than those in the cyclic ones. The reasons for the smaller HB energies in non-cyclic clusters are twofold: (i) As compared to the respective cyclic clusters, there is one HB less in linear non-cyclic one. Because of this, the HB cooperativity contribution is expected to be smaller in later one. (ii) Another reason could be attributed to the fact that, the terminal HBs in linear non-cyclic clusters have only one adjacent neighbour in their cooperative network of HB. Evidently, the cooperativity contribution to such HB is much smaller. Thus much smaller cooperativity networking in linear non-cyclic clusters could be possible reason for the much weaker HB strengths as compared to the cyclic ones. Nevertheless, the energetic rank-ordering follows: F-H...O HB > F-H...F > O-H...O > O-H...F, in all the clusters studied this work.

**Table S7:** The F-H...O HB energies (kcal mol<sup>-1</sup>), the unscaled F-H stretching frequencies (cm<sup>-1</sup>) of the bond involved in the F-H...O HB and molecular electron density (MED) and molecular electrostatic potential (MESP) values (a. u.) at the corresponding bond critical point (BCP) in cyclic (HF)<sub>m</sub>(H<sub>2</sub>O)<sub>n</sub>-A clusters, at MP2/aVTZ level.

| Conformers<br>A                                      | HB<br>Labels | H-F<br>Distance | HB energy<br>(kcal/mol) | MESP at<br>BCP | MED at<br>BCP (a.u.) | F-H...O stretching<br>frequency (cm <sup>-1</sup> ) |
|------------------------------------------------------|--------------|-----------------|-------------------------|----------------|----------------------|-----------------------------------------------------|
| (HF) <sub>1</sub> (H <sub>2</sub> O) <sub>1</sub> -A | HB1          | 0.94            | 9.25                    | 0.1658         | 0.0415               | 3675                                                |
| (HF) <sub>1</sub> (H <sub>2</sub> O) <sub>2</sub> -A | HB3          | 0.96            | 11.74                   | 0.1873         | 0.0487               | 3386                                                |
| (HF) <sub>2</sub> (H <sub>2</sub> O) <sub>1</sub> -A | HB1          | 0.96            | 12.38                   | 0.2214         | 0.0516               | 3321                                                |
| (HF) <sub>1</sub> (H <sub>2</sub> O) <sub>3</sub> -A | HB3          | 0.97            | 14.88                   | 0.2241         | 0.0609               | 3099                                                |
| (HF) <sub>2</sub> (H <sub>2</sub> O) <sub>2</sub> -A | HB1          | 0.97            | 14.53                   | 0.2352         | 0.0596               | 3193                                                |
|                                                      | HB3          | 0.97            | 14.53                   | 0.2352         | 0.0596               | 3193                                                |
| (HF) <sub>3</sub> (H <sub>2</sub> O) <sub>1</sub> -A | HB4          | 0.98            | 16.12                   | 0.2924         | 0.0701               | 2948                                                |
| (HF) <sub>1</sub> (H <sub>2</sub> O) <sub>4</sub> -A | HB4          | 0.98            | 16.00                   | 0.2514         | 0.0688               | 3010                                                |
| (HF) <sub>2</sub> (H <sub>2</sub> O) <sub>3</sub> -A | HB2          | 0.98            | 17.09                   | 0.3105         | 0.0816               | 2820                                                |
|                                                      | HB5          | 0.98            | 15.75                   | 0.2889         | 0.0754               | 3001                                                |
| (HF) <sub>3</sub> (H <sub>2</sub> O) <sub>2</sub> -A | HB2          | 0.98            | 15.71                   | 0.2599         | 0.0647               | 3044                                                |
|                                                      | HB5          | 0.99            | 17.57                   | 0.2916         | 0.0718               | 2828                                                |
| (HF) <sub>4</sub> (H <sub>2</sub> O) <sub>1</sub> -A | HB1          | 0.99            | 17.87                   | 0.3223         | 0.0771               | 2788                                                |
| (HF) <sub>1</sub> (H <sub>2</sub> O) <sub>5</sub> -A | HB5          | 0.98            | 16.28                   | 0.2540         | 0.0695               | 3002                                                |
| (HF) <sub>2</sub> (H <sub>2</sub> O) <sub>4</sub> -A | HB2          | 0.98            | 16.34                   | 0.2620         | 0.0700               | 3022                                                |
|                                                      | HB5          | 0.98            | 16.34                   | 0.2620         | 0.0700               | 3022                                                |
| (HF) <sub>3</sub> (H <sub>2</sub> O) <sub>3</sub> -A | HB1          | 0.98            | 16.27                   | 0.2732         | 0.0703               | 3034                                                |
|                                                      | HB3          | 0.98            | 15.98                   | 0.2724         | 0.0700               | 3042                                                |
|                                                      | HB5          | 0.98            | 16.14                   | 0.2709         | 0.0698               | 3042                                                |
| (HF) <sub>4</sub> (H <sub>2</sub> O) <sub>2</sub> -A | HB1          | 0.98            | 17.44                   | 0.2949         | 0.0719               | 2877                                                |
|                                                      | HB4          | 0.98            | 17.44                   | 0.2949         | 0.0719               | 2877                                                |
| (HF) <sub>5</sub> (H <sub>2</sub> O) <sub>1</sub> -A | HB1          | 0.99            | 18.44                   | 0.3335         | 0.0794               | 2741                                                |
| (HF) <sub>1</sub> (H <sub>2</sub> O) <sub>6</sub> -A | HB7          | 0.98            | 16.66                   | 0.2514         | 0.0719               | 2941                                                |
| (HF) <sub>2</sub> (H <sub>2</sub> O) <sub>5</sub> -A | HB5          | 0.98            | 16.96                   | 0.2808         | 0.0695               | 2918                                                |
|                                                      | HB7          | 1.00            | 19.83                   | 0.3028         | 0.0810               | 2599                                                |
| (HF) <sub>3</sub> (H <sub>2</sub> O) <sub>4</sub> -A | HB2          | 0.98            | 15.96                   | 0.2645         | 0.0692               | 3007                                                |
|                                                      | HB4          | 1.01            | 19.93                   | 0.3394         | 0.0890               | 2506                                                |
|                                                      | HB7          | 0.97            | 14.43                   | 0.2678         | 0.0646               | 3120                                                |
| (HF) <sub>4</sub> (H <sub>2</sub> O) <sub>3</sub> -A | HB2          | 0.96            | 15.87                   | 0.2723         | 0.0693               | 3039                                                |
|                                                      | HB5          | 0.99            | 18.29                   | 0.3137         | 0.0788               | 2766                                                |
|                                                      | HB7          | 0.98            | 16.14                   | 0.2780         | 0.0708               | 2976                                                |
| (HF) <sub>5</sub> (H <sub>2</sub> O) <sub>2</sub> -A | HB3          | 0.99            | 17.71                   | 0.3124         | 0.0764               | 2839                                                |
|                                                      | HB7          | 0.99            | 18.31                   | 0.3240         | 0.0793               | 2743                                                |
| (HF) <sub>6</sub> (H <sub>2</sub> O) <sub>1</sub> -A | HB1          | 0.99            | 18.71                   | 0.3264         | 0.0766               | 2711                                                |
| (HF) <sub>1</sub> (H <sub>2</sub> O) <sub>7</sub> -A | HB2          | 1.00            | 18.76                   | 0.2961         | 0.0817               | 2673                                                |
| (HF) <sub>2</sub> (H <sub>2</sub> O) <sub>6</sub> -A | HB10         | 0.99            | 18.13                   | 0.2979         | 0.0794               | 2735                                                |
|                                                      | HB12         | 1.00            | 19.19                   | 0.3133         | 0.0836               | 2621                                                |
| (HF) <sub>3</sub> (H <sub>2</sub> O) <sub>5</sub> -A | HB3          | 0.99            | 18.45                   | 0.3129         | 0.0806               | 2770                                                |
|                                                      | HB5          | 1.00            | 18.68                   | 0.3139         | 0.0820               | 2770                                                |
|                                                      | HB8          | 0.99            | 18.44                   | 0.3129         | 0.0806               | 2770                                                |
| (HF) <sub>4</sub> (H <sub>2</sub> O) <sub>4</sub> -A | HB1          | 1.00            | 18.39                   | 0.3260         | 0.0811               | 2820                                                |
|                                                      | HB3          | 1.00            | 18.39                   | 0.3260         | 0.0811               | 2820                                                |
|                                                      | HB6          | 1.00            | 18.39                   | 0.3260         | 0.0811               | 2820                                                |
|                                                      | HB10         | 1.00            | 18.39                   | 0.3260         | 0.0811               | 2820                                                |
| (HF) <sub>5</sub> (H <sub>2</sub> O) <sub>3</sub> -A | HB1          | 0.97            | 14.57                   | 0.2461         | 0.0572               | 3184                                                |
|                                                      | HB2          | 0.96            | 13.18                   | 0.2218         | 0.0509               | 3320                                                |
|                                                      | HB4          | 0.97            | 15.01                   | 0.2547         | 0.0619               | 3071                                                |
|                                                      | HB8          | 0.99            | 17.49                   | 0.2965         | 0.0717               | 2835                                                |
| (HF) <sub>6</sub> (H <sub>2</sub> O) <sub>2</sub> -A | HB2          | 1.00            | 20.22                   | 0.3460         | 0.0863               | 2563                                                |
|                                                      | HB6          | 0.97            | 14.24                   | 0.2927         | 0.0633               | 3113                                                |
| (HF) <sub>7</sub> (H <sub>2</sub> O) <sub>1</sub> -A | HB1          | 0.97            | 15.57                   | 0.2970         | 0.0640               | 3057                                                |
|                                                      | HB9          | 0.96            | 13.97                   | 0.2690         | 0.0568               | 3216                                                |

**Table S8:** The F-H...F HB energies (kcal mol<sup>-1</sup>), the unscaled F-H stretching frequencies (cm<sup>-1</sup>) of the bond involved in the F-H...F HB and molecular electron density (MED) and molecular electrostatic potential (MESP) values (a. u.) at the corresponding bond critical point (BCP) in cyclic (HF)<sub>m</sub>(H<sub>2</sub>O)<sub>n</sub>-A clusters at MP2/aVTZ level.

| Conformers<br>A                                      | HB<br>Labels | H-F<br>Distance | HB energy<br>(kcal/mol) | MESP at<br>BCP (a.u.) | MED at<br>BCP (a.u.) | F-H...F stretching<br>frequency (cm <sup>-1</sup> ) |
|------------------------------------------------------|--------------|-----------------|-------------------------|-----------------------|----------------------|-----------------------------------------------------|
| (HF) <sub>2</sub> (H <sub>2</sub> O) <sub>1</sub> -A | HB3          | 0.94            | 7.62                    | 0.1677                | 0.0320               | 3745                                                |
| (HF) <sub>3</sub> (H <sub>2</sub> O) <sub>1</sub> -A | HB2          | 0.95            | 9.38                    | 0.2263                | 0.0450               | 3570                                                |
|                                                      | HB3          | 0.96            | 11.29                   | 0.2586                | 0.0532               | 3412                                                |
| (HF) <sub>3</sub> (H <sub>2</sub> O) <sub>2</sub> -A | HB4          | 0.96            | 11.33                   | 0.2409                | 0.0503               | 3433                                                |
| (HF) <sub>4</sub> (H <sub>2</sub> O) <sub>1</sub> -A | HB2          | 0.96            | 12.71                   | 0.2920                | 0.0598               | 3273                                                |
|                                                      | HB3          | 0.96            | 11.06                   | 0.2733                | 0.0538               | 3437                                                |
|                                                      | HB4          | 0.95            | 9.83                    | 0.2497                | 0.0486               | 3535                                                |
| (HF) <sub>4</sub> (H <sub>2</sub> O) <sub>2</sub> -A | HB2          | 0.96            | 11.41                   | 0.2478                | 0.0512               | 3423                                                |
|                                                      | HB5          | 0.96            | 11.41                   | 0.2478                | 0.0512               | 3423                                                |
| (HF) <sub>5</sub> (H <sub>2</sub> O) <sub>1</sub> -A | HB2          | 0.97            | 13.06                   | 0.3063                | 0.0627               | 3216                                                |
|                                                      | HB3          | 0.96            | 11.27                   | 0.2885                | 0.0565               | 3365                                                |
|                                                      | HB4          | 0.96            | 10.60                   | 0.2761                | 0.0533               | 3472                                                |
|                                                      | HB5          | 0.95            | 9.76                    | 0.2549                | 0.0490               | 3543                                                |
| (HF) <sub>4</sub> (H <sub>2</sub> O) <sub>3</sub> -A | HB4          | 0.96            | 11.37                   | 0.2612                | 0.0565               | 3406                                                |
| (HF) <sub>5</sub> (H <sub>2</sub> O) <sub>2</sub> -A | HB2          | 0.96            | 11.57                   | 0.2700                | 0.0570               | 3389                                                |
|                                                      | HB5          | 0.95            | 10.02                   | 0.2544                | 0.0513               | 3502                                                |
|                                                      | HB6          | 0.96            | 12.49                   | 0.2891                | 0.0607               | 3294                                                |
| (HF) <sub>6</sub> (H <sub>2</sub> O) <sub>1</sub> -A | HB2          | 0.97            | 13.11                   | 0.3008                | 0.0598               | 3188                                                |
|                                                      | HB3          | 0.96            | 11.19                   | 0.2824                | 0.0531               | 3313                                                |
|                                                      | HB4          | 0.96            | 11.04                   | 0.2747                | 0.0511               | 3313                                                |
|                                                      | HB5          | 0.96            | 10.51                   | 0.2689                | 0.0497               | 3542                                                |
|                                                      | HB6          | 0.95            | 9.51                    | 0.2469                | 0.0455               | 3605                                                |
| (HF) <sub>5</sub> (H <sub>2</sub> O) <sub>3</sub> -A | HB7          | 0.96            | 11.66                   | 0.2527                | 0.0517               | 3407                                                |
| (HF) <sub>6</sub> (H <sub>2</sub> O) <sub>2</sub> -A | HB3          | 0.97            | 14.05                   | 0.3075                | 0.0654               | 3177                                                |
|                                                      | HB4          | 0.96            | 11.64                   | 0.2844                | 0.0571               | 3374                                                |
|                                                      | HB7          | 0.95            | 10.60                   | 0.2679                | 0.0506               | 3481                                                |
|                                                      | HB8          | 0.95            | 9.19                    | 0.2393                | 0.0459               | 3633                                                |
| (HF) <sub>7</sub> (H <sub>2</sub> O) <sub>1</sub> -A | HB2          | 0.96            | 11.39                   | 0.2870                | 0.0543               | 3351                                                |
|                                                      | HB3          | 0.96            | 10.69                   | 0.2800                | 0.0525               | 3351                                                |
|                                                      | HB4          | 0.95            | 10.15                   | 0.2690                | 0.0504               | 3351                                                |
|                                                      | HB7          | 0.95            | 9.42                    | 0.2450                | 0.0456               | 3481                                                |
|                                                      | HB8          | 0.95            | 10.24                   | 0.2580                | 0.0483               | 3481                                                |

**Table S9:** The O-H...O HB energies (kcal mol<sup>-1</sup>), the unscaled F-H stretching frequencies (cm<sup>-1</sup>) of the bond involved in the O-H...O HB and molecular electron density (MED) and molecular electrostatic potential (MESP) values (a. u.) at the corresponding bond critical point (BCP) in cyclic (HF)<sub>m</sub>(H<sub>2</sub>O)<sub>n</sub>-A clusters at MP2/aVTZ level.

| Conformers<br>(HF) <sub>m</sub> (H <sub>2</sub> O) <sub>n</sub> | HB<br>Labels                                         | O-H<br>Distance | HB energy<br>(kcal/mol) | MESP at<br>BCP (a.u.) | MED at<br>BCP (a.u.) | O-H...O stretching<br>frequency (cm <sup>-1</sup> ) |      |
|-----------------------------------------------------------------|------------------------------------------------------|-----------------|-------------------------|-----------------------|----------------------|-----------------------------------------------------|------|
| (HF) <sub>1</sub> (H <sub>2</sub> O) <sub>2</sub> -A            | HB1                                                  | 0.98            | 7.62                    | 0.0904                | 0.0264               | 3578                                                |      |
| (HF) <sub>1</sub> (H <sub>2</sub> O) <sub>3</sub> -A            | HB1                                                  | 0.98            | 7.87                    | 0.1005                | 0.0331               | 3488                                                |      |
|                                                                 | HB2                                                  | 0.99            | 9.47                    | 0.1241                | 0.0398               | 3367                                                |      |
| (HF) <sub>1</sub> (H <sub>2</sub> O) <sub>4</sub> -A            | HB1                                                  | 0.98            | 8.68                    | 0.1199                | 0.0399               | 3443                                                |      |
|                                                                 | HB2                                                  | 0.99            | 9.22                    | 0.1280                | 0.0423               | 3379                                                |      |
|                                                                 | HB3                                                  | 0.99            | 10.19                   | 0.1480                | 0.0463               | 3295                                                |      |
| (HF) <sub>2</sub> (H <sub>2</sub> O) <sub>3</sub> -A            | HB3                                                  | 0.99            | 10.16                   | 0.1657                | 0.0476               | 3355                                                |      |
| (HF) <sub>1</sub> (H <sub>2</sub> O) <sub>5</sub> -A            | HB1                                                  | 0.99            | 8.63                    | 0.1188                | 0.0400               | 3456                                                |      |
|                                                                 | HB2                                                  | 0.99            | 9.06                    | 0.1220                | 0.0418               | 3415                                                |      |
|                                                                 | HB3                                                  | 0.99            | 9.36                    | 0.1289                | 0.0429               | 3415                                                |      |
|                                                                 | HB4                                                  | 0.99            | 10.27                   | 0.1489                | 0.0468               | 3361                                                |      |
| (HF) <sub>2</sub> (H <sub>2</sub> O) <sub>4</sub> -A            | HB1                                                  | 0.99            | 9.81                    | 0.1528                | 0.0453               | 3349                                                |      |
| (HF) <sub>1</sub> (H <sub>2</sub> O) <sub>6</sub> -A            | HB4                                                  | 0.99            | 9.81                    | 0.1528                | 0.0453               | 3349                                                |      |
|                                                                 | HB1                                                  | 0.98            | 4.87                    | 0.0880                | 0.0268               | 3586                                                |      |
| (HF) <sub>2</sub> (H <sub>2</sub> O) <sub>5</sub> -A            | HB2                                                  | 0.98            | 8.35                    | 0.1259                | 0.0379               | 3410                                                |      |
|                                                                 | HB3                                                  | 0.99            | 6.61                    | 0.1108                | 0.0323               | 3528                                                |      |
|                                                                 | HB4                                                  | 0.97            | 10.31                   | 0.1506                | 0.0503               | 3155                                                |      |
|                                                                 | HB5                                                  | 0.98            | 7.28                    | 0.1012                | 0.0356               | 3493                                                |      |
|                                                                 | HB8                                                  | 0.98            | 6.03                    | 0.0899                | 0.0277               | 3586                                                |      |
|                                                                 | HB9                                                  | 0.97            | 5.59                    | 0.0658                | 0.0212               | 3693                                                |      |
|                                                                 | HB1                                                  | 0.98            | 6.34                    | 0.1588                | 0.0364               | 3423                                                |      |
|                                                                 | HB2                                                  | 0.98            | 7.35                    | 0.1040                | 0.0311               | 3520                                                |      |
|                                                                 | HB3                                                  | 0.98            | 5.44                    | 0.1065                | 0.0288               | 3622                                                |      |
| (HF) <sub>3</sub> (H <sub>2</sub> O) <sub>4</sub> -A            | HB8                                                  | 0.98            | 7.84                    | 0.0994                | 0.0275               | 3576                                                |      |
| (HF) <sub>1</sub> (H <sub>2</sub> O) <sub>7</sub> -A            | HB1                                                  | 0.99            | 9.44                    | 0.1474                | 0.0439               | 3345                                                |      |
|                                                                 | HB1                                                  | 0.98            | 8.32                    | 0.1112                | 0.0315               | 3518                                                |      |
|                                                                 | HB4                                                  | 1.00            | 10.28                   | 0.1494                | 0.0482               | 3218                                                |      |
|                                                                 | HB5                                                  | 0.98            | 3.95                    | 0.0942                | 0.0289               | 3593                                                |      |
|                                                                 | HB6                                                  | 0.99            | 10.03                   | 0.1436                | 0.0468               | 3255                                                |      |
|                                                                 | HB8                                                  | 0.98            | 7.20                    | 0.0888                | 0.0264               | 3615                                                |      |
|                                                                 | HB9                                                  | 1.00            | 10.44                   | 0.1504                | 0.0485               | 3194                                                |      |
|                                                                 | HB10                                                 | 0.98            | 3.30                    | 0.0886                | 0.0264               | 3594                                                |      |
|                                                                 | HB11                                                 | 0.98            | 7.24                    | 0.0892                | 0.0344               | 3576                                                |      |
|                                                                 | HB12                                                 | 0.98            | 4.06                    | 0.1144                | 0.0324               | 3561                                                |      |
|                                                                 | (HF) <sub>2</sub> (H <sub>2</sub> O) <sub>6</sub> -A | HB1             | 0.98                    | 8.44                  | 0.1213               | 0.0319                                              | 3520 |
|                                                                 |                                                      | HB2             | 0.98                    | 3.72                  | 0.1203               | 0.0310                                              | 3579 |
| HB3                                                             |                                                      | 1.00            | 10.38                   | 0.1616                | 0.0488               | 3206                                                |      |
| HB4                                                             |                                                      | 0.98            | 3.68                    | 0.1000                | 0.0275               | 3608                                                |      |
| HB5                                                             |                                                      | 0.99            | 10.00                   | 0.1555                | 0.0472               | 3243                                                |      |
| HB11                                                            |                                                      | 0.98            | 8.31                    | 0.1181                | 0.0305               | 3547                                                |      |
| (HF) <sub>3</sub> (H <sub>2</sub> O) <sub>5</sub> -A            | HB1                                                  | 1.00            | 10.14                   | 0.1667                | 0.0475               | 3234                                                |      |
|                                                                 | HB2                                                  | 0.98            | 8.32                    | 0.1313                | 0.0317               | 3523                                                |      |
|                                                                 | HB9                                                  | 0.98            | 8.32                    | 0.1313                | 0.0317               | 3523                                                |      |
| (HF) <sub>6</sub> (H <sub>2</sub> O) <sub>2</sub> -A            | HB1                                                  | 0.97            | 7.75                    | 0.1305                | 0.0260               | 3582                                                |      |

**Table S10:** The O-H...F HB energies (kcal mol<sup>-1</sup>), the unscaled F-H stretching frequencies (cm<sup>-1</sup>) of the bond involved in the O-H...F HB and molecular electron density (MED) and molecular electrostatic potential (MESP) values (a. u.) at the corresponding bond critical point (BCP) in cyclic (HF)<sub>m</sub>(H<sub>2</sub>O)<sub>n</sub>-A clusters at MP2/aVTZ level.

| Conformers<br>(HF) <sub>m</sub> (H <sub>2</sub> O) <sub>n</sub> | HB<br>Labels | O-H<br>Distance | HB energy<br>(kcal/mol) | MESP at<br>BCP (a.u.) | MED at<br>BCP (a.u.) | O-H...F stretching<br>frequency (cm <sup>-1</sup> ) |
|-----------------------------------------------------------------|--------------|-----------------|-------------------------|-----------------------|----------------------|-----------------------------------------------------|
| (HF) <sub>1</sub> (H <sub>2</sub> O) <sub>2</sub> -A            | HB2          | 0.97            | 6.31                    | 0.0697                | 0.0154               | 3692                                                |
| (HF) <sub>2</sub> (H <sub>2</sub> O) <sub>1</sub> -A            | HB2          | 0.97            | 6.78                    | -                     | 0.0127               | 3699                                                |
| (HF) <sub>1</sub> (H <sub>2</sub> O) <sub>3</sub> -A            | HB4          | 0.98            | 6.62                    | 0.0952                | 0.0269               | 3606                                                |
| (HF) <sub>2</sub> (H <sub>2</sub> O) <sub>2</sub> -A            | HB2          | 0.98            | 7.42                    | 0.1242                | 0.0296               | 3567                                                |
|                                                                 | HB4          | 0.98            | 7.42                    | 0.1242                | 0.0296               | 3567                                                |
| (HF) <sub>3</sub> (H <sub>2</sub> O) <sub>1</sub> -A            | HB1          | 0.98            | 6.94                    | 0.1413                | 0.0289               | 3570                                                |
| (HF) <sub>1</sub> (H <sub>2</sub> O) <sub>4</sub> -A            | HB5          | 0.98            | 6.65                    | 0.1182                | 0.0323               | 3585                                                |
| (HF) <sub>2</sub> (H <sub>2</sub> O) <sub>3</sub> -A            | HB1          | 0.98            | 8.21                    | 0.1558                | 0.0387               | 3556                                                |
|                                                                 | HB4          | 0.98            | 7.17                    | 0.1315                | 0.0340               | 3624                                                |
| (HF) <sub>3</sub> (H <sub>2</sub> O) <sub>2</sub> -A            | HB1          | 0.98            | 7.80                    | 0.1540                | 0.0351               | 3512                                                |
|                                                                 | HB3          | 0.98            | 6.90                    | 0.1427                | 0.0314               | 3576                                                |
| (HF) <sub>4</sub> (H <sub>2</sub> O) <sub>1</sub> -A            | HB5          | 0.98            | 6.93                    | 0.1686                | 0.0338               | 3535                                                |
| (HF) <sub>1</sub> (H <sub>2</sub> O) <sub>5</sub> -A            | HB6          | 0.98            | 6.55                    | 0.1192                | 0.0323               | 3594                                                |
| (HF) <sub>2</sub> (H <sub>2</sub> O) <sub>4</sub> -A            | HB3          | 0.98            | 6.78                    | 0.1332                | 0.0339               | 3575                                                |
|                                                                 | HB6          | 0.98            | 6.78                    | 0.1332                | 0.0339               | 3575                                                |
| (HF) <sub>3</sub> (H <sub>2</sub> O) <sub>3</sub> -A            | HB2          | 0.98            | 7.57                    | 0.1588                | 0.0373               | 3522                                                |
|                                                                 | HB4          | 0.98            | 7.24                    | 0.1574                | 0.0370               | 3531                                                |
|                                                                 | HB6          | 0.98            | 7.36                    | 0.1575                | 0.0367               | 3537                                                |
| (HF) <sub>4</sub> (H <sub>2</sub> O) <sub>2</sub> -A            | HB3          | 0.98            | 7.00                    | 0.1541                | 0.0330               | 3560                                                |
|                                                                 | HB6          | 0.98            | 7.00                    | 0.1541                | 0.0330               | 3560                                                |
| (HF) <sub>5</sub> (H <sub>2</sub> O) <sub>1</sub> -A            | HB6          | 0.98            | 6.72                    | 0.1754                | 0.0342               | 3543                                                |
| (HF) <sub>1</sub> (H <sub>2</sub> O) <sub>6</sub> -A            | HB6          | 0.98            | 6.83                    | 0.1086                | 0.0321               | 3579                                                |
| (HF) <sub>2</sub> (H <sub>2</sub> O) <sub>5</sub> -A            | HB4          | 0.98            | 7.24                    | 0.1603                | 0.0356               | 3492                                                |
|                                                                 | HB6          | 0.99            | 8.86                    | 0.1633                | 0.0393               | 3438                                                |
| (HF) <sub>3</sub> (H <sub>2</sub> O) <sub>4</sub> -A            | HB3          | 0.98            | 6.49                    | 0.1506                | 0.0367               | 3518                                                |
|                                                                 | HB5          | 0.97            | 4.13                    | 0.0784                | 0.0210               | 3679                                                |
|                                                                 | HB6          | 0.98            | 7.16                    | 0.1374                | 0.0301               | 3583                                                |
|                                                                 | HB8          | 0.97            | 1.99                    | 0.0778                | 0.0175               | 3679                                                |
|                                                                 | HB9          | 0.97            | 5.83                    | 0.0952                | 0.0169               | 3730                                                |
| (HF) <sub>4</sub> (H <sub>2</sub> O) <sub>3</sub> -A            | HB1          | 0.98            | 7.22                    | 0.1622                | 0.0375               | 3524                                                |
|                                                                 | HB3          | 0.98            | 6.22                    | 0.1533                | 0.0344               | 3576                                                |
|                                                                 | HB6          | 0.98            | 7.44                    | 0.1694                | 0.0389               | 3504                                                |
| (HF) <sub>5</sub> (H <sub>2</sub> O) <sub>2</sub> -A            | HB1          | 0.98            | 6.71                    | 0.1735                | 0.0362               | 3553                                                |
|                                                                 | HB4          | 0.98            | 6.42                    | 0.1669                | 0.0345               | 3587                                                |
| (HF) <sub>6</sub> (H <sub>2</sub> O) <sub>1</sub> -A            | HB7          | 0.98            | 6.49                    | 0.1655                | 0.0323               | 3542                                                |
| (HF) <sub>1</sub> (H <sub>2</sub> O) <sub>7</sub> -A            | HB3          | 0.97            | 5.99                    | 0.0739                | 0.0210               | 3699                                                |
|                                                                 | HB7          | 0.97            | 1.85                    | 0.0778                | 0.0219               | 3722                                                |
| (HF) <sub>2</sub> (H <sub>2</sub> O) <sub>6</sub> -A            | HB6          | 0.97            | 2.13                    | 0.0898                | 0.0225               | 3742                                                |
|                                                                 | HB7          | 0.97            | 5.99                    | 0.0824                | 0.0209               | 3712                                                |
|                                                                 | HB8          | 0.97            | 6.05                    | 0.0806                | 0.0202               | 3659                                                |
|                                                                 | HB9          | 0.98            | 2.20                    | 0.1097                | 0.0260               | 3652                                                |
| (HF) <sub>3</sub> (H <sub>2</sub> O) <sub>5</sub> -A            | HB4          | 0.98            | 7.13                    | 0.1191                | 0.0258               | 3611                                                |
|                                                                 | HB6          | 0.98            | 6.96                    | 0.1121                | 0.0239               | 3657                                                |
|                                                                 | HB7          | 0.98            | 6.96                    | 0.1121                | 0.0239               | 3657                                                |
|                                                                 | HB10         | 0.97            | 5.93                    | 0.0920                | 0.0206               | 3666                                                |

|      |      |      |        |        |      |
|------|------|------|--------|--------|------|
| HB11 | 0.97 | 5.93 | 0.0920 | 0.0206 | 3666 |
| HB12 | 0.98 | 7.13 | 0.1191 | 0.0258 | 3611 |

**Table S10:** Continued...

| <b>Conformers<br/>(HF)<sub>m</sub>(H<sub>2</sub>O)<sub>n</sub></b> | <b>HB<br/>Labels</b> | <b>O-H<br/>Distance</b> | <b>HB energy<br/>(kcal/mol)</b> | <b>MESP at<br/>BCP (a.u.)</b> | <b>MED at<br/>BCP (a.u.)</b> | <b>O-H...F stretching<br/>frequency (cm<sup>-1</sup>)</b> |
|--------------------------------------------------------------------|----------------------|-------------------------|---------------------------------|-------------------------------|------------------------------|-----------------------------------------------------------|
| <b>(HF)<sub>4</sub>(H<sub>2</sub>O)<sub>4</sub> -A</b>             | HB2                  | 0.98                    | 7.04                            | 0.1230                        | 0.0242                       | 3618                                                      |
|                                                                    | HB4                  | 0.98                    | 7.04                            | 0.1230                        | 0.0242                       | 3618                                                      |
|                                                                    | HB5                  | 0.98                    | 7.04                            | 0.1230                        | 0.0242                       | 3618                                                      |
|                                                                    | HB7                  | 0.98                    | 7.04                            | 0.1230                        | 0.0242                       | 3618                                                      |
|                                                                    | HB8                  | 0.98                    | 7.04                            | 0.1230                        | 0.0242                       | 3618                                                      |
|                                                                    | HB9                  | 0.98                    | 7.04                            | 0.1230                        | 0.0242                       | 3618                                                      |
|                                                                    | HB11                 | 0.98                    | 7.04                            | 0.1230                        | 0.0242                       | 3618                                                      |
|                                                                    | HB12                 | 0.98                    | 7.04                            | 0.1230                        | 0.0242                       | 3618                                                      |
| <b>(HF)<sub>5</sub>(H<sub>2</sub>O)<sub>3</sub> -A</b>             | HB3                  | 0.98                    | 6.99                            | 0.1280                        | 0.0314                       | 3594                                                      |
|                                                                    | HB5                  | 0.98                    | 7.83                            | 0.1640                        | 0.0356                       | 3504                                                      |
|                                                                    | HB6                  | 0.98                    | 7.13                            | 0.1712                        | 0.0355                       | 3538                                                      |
|                                                                    | HB9                  | 0.98                    | 7.35                            | 0.1543                        | 0.0331                       | 3544                                                      |
| <b>(HF)<sub>6</sub>(H<sub>2</sub>O)<sub>2</sub> -A</b>             | HB5                  | 0.99                    | 7.63                            | 0.2162                        | 0.0419                       | 3469                                                      |
|                                                                    | HB9                  | 0.98                    | 4.29                            | 0.1521                        | 0.0311                       | 3582                                                      |
| <b>(HF)<sub>7</sub>(H<sub>2</sub>O)<sub>1</sub> -A</b>             | HB5                  | 0.98                    | 7.27                            | 0.2110                        | 0.0394                       | 3506                                                      |
|                                                                    | HB6                  | 0.98                    | 7.27                            | 0.1910                        | 0.0356                       | 3506                                                      |



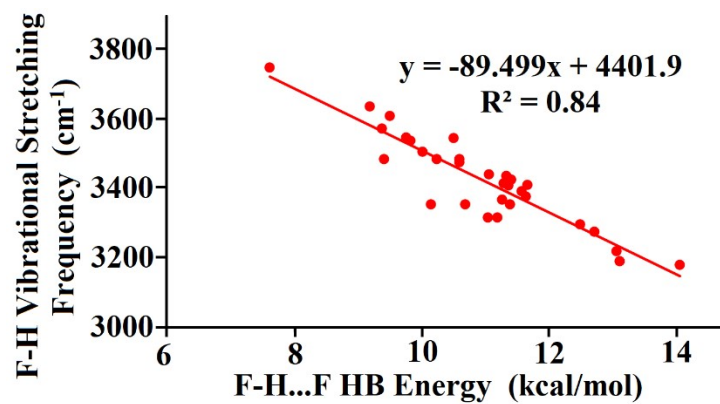

(A)

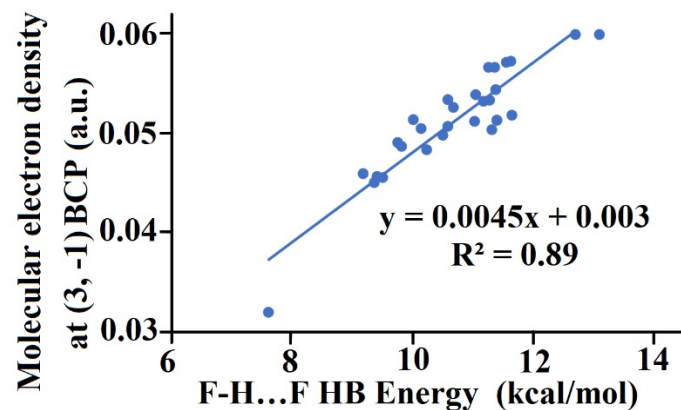

(B)

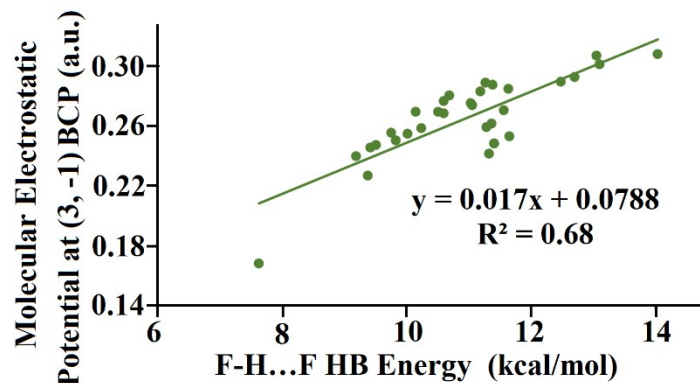

(C)

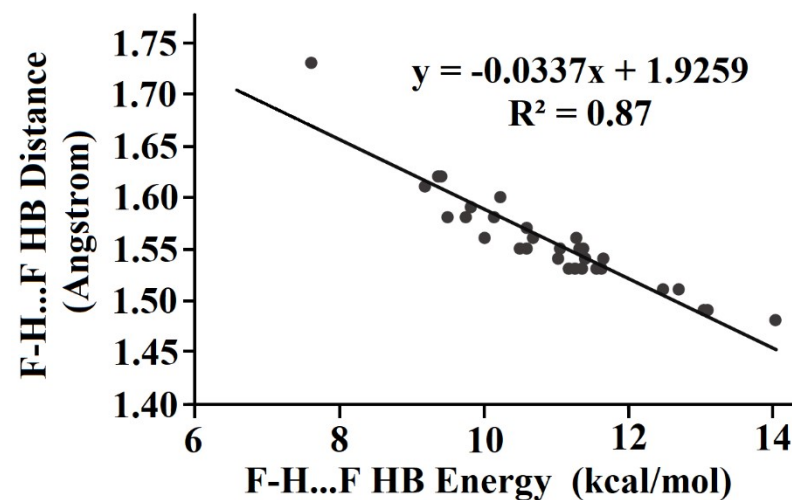

(D)

**Figure S3:** Correlation plots between the F-H...F hydrogen bond energy and (A) F-H stretching frequency (in  $\text{cm}^{-1}$ ), (B), molecular electron density (MED) value (in a.u.) at (3,-1) bond critical point (BCP), (C) molecular electrostatic potential ( $V(\mathbf{r})$ ) value (in a.u.) at (3,-1) bond critical point (BCP) and (D) F-H...F hydrogen bond (HB) distances (in angstrom), in cyclic  $(\text{HF})_m(\text{H}_2\text{O})_n$ -A clusters.



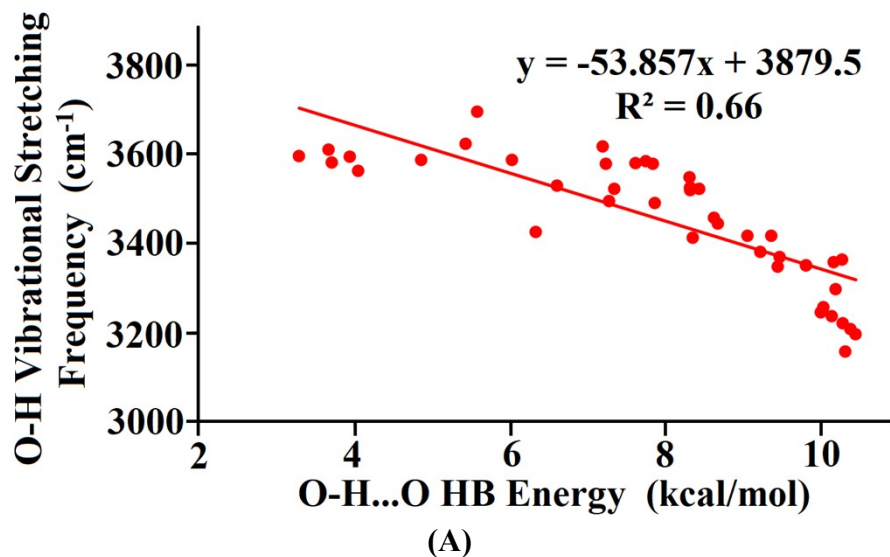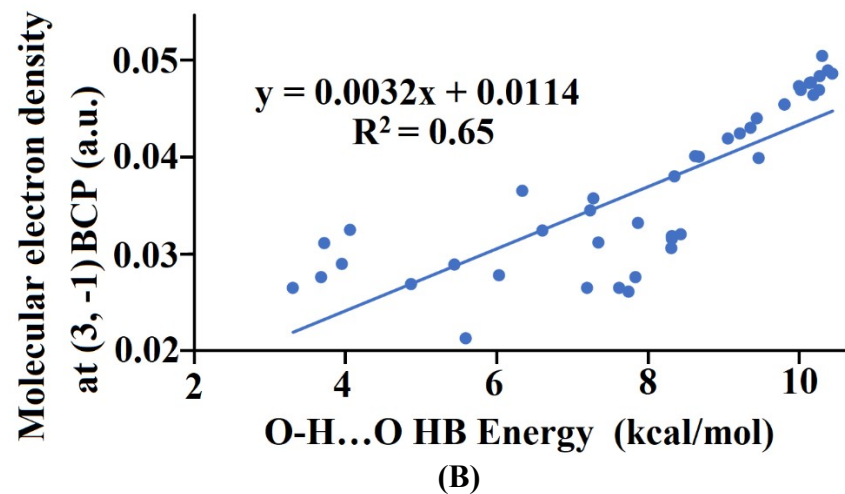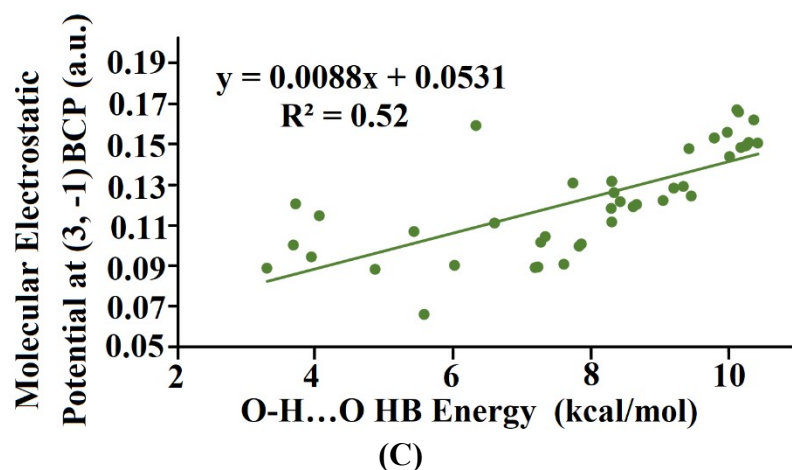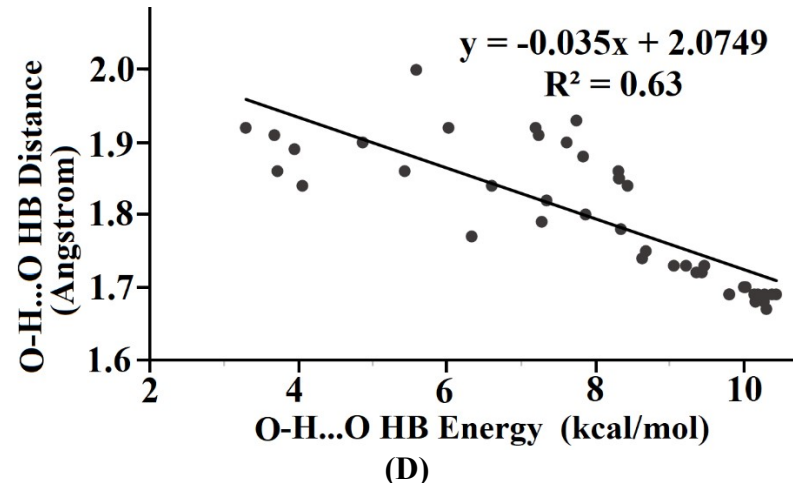

**Figure S4:** Correlation plots between the O-H...O hydrogen bond energy and (A) F-H stretching frequency (in  $\text{cm}^{-1}$ ), (B), molecular electron density (MED) value (in a.u.) at (3,-1) bond critical point (BCP), (C) molecular electrostatic potential ( $V(r)$ ) value (in a.u.) at (3,-1) bond critical point (BCP) and (D) O-H...O hydrogen bond (HB) distances (in angstrom), in cyclic  $(\text{HF})_m(\text{H}_2\text{O})_n$ -A cluster.

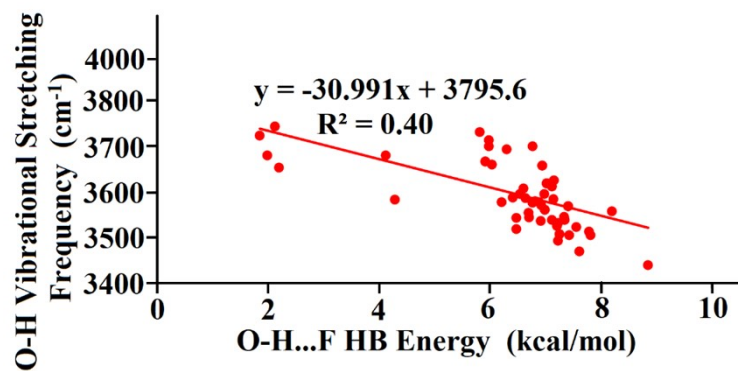

(A)

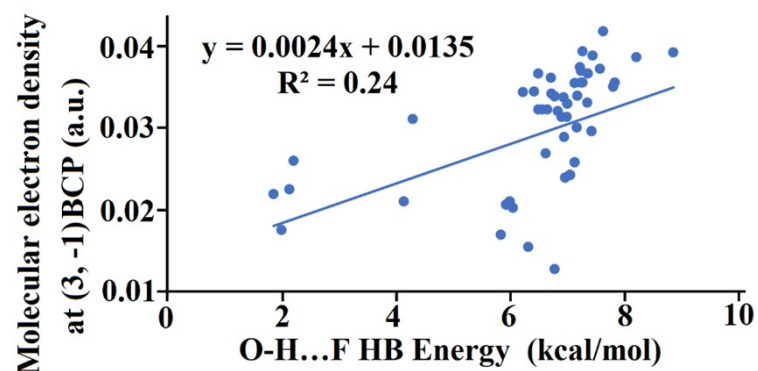

(B)

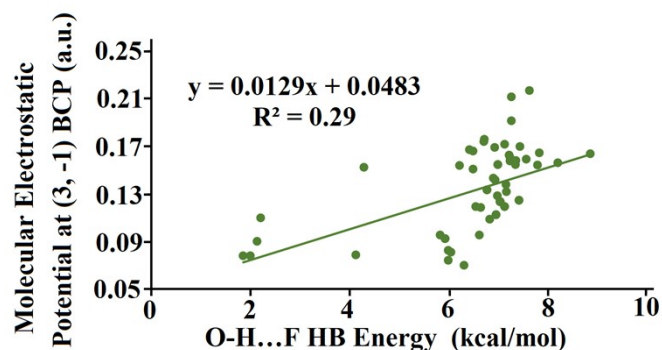

(C)

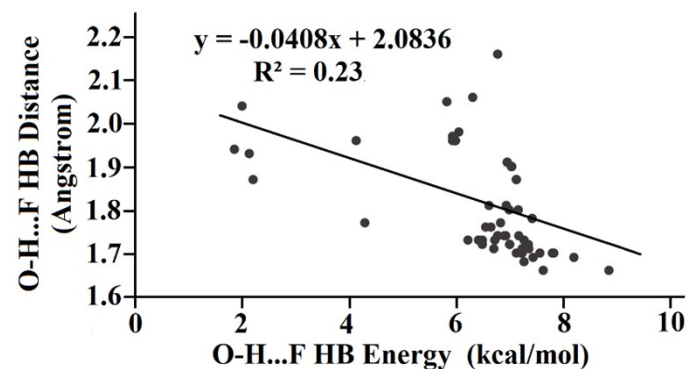

(D)

**Figure S5:** Correlation plots between the F-H...O hydrogen bond energy and (A) F-H stretching frequency (in cm<sup>-1</sup>), (B), molecular electron density (MED) value (in a.u.) at (3,-1) bond critical point (BCP), (C) molecular electrostatic potential (V(r)) value (in a.u.) at (3,-1) bond critical point (BCP) and (D) F-H...O hydrogen bond (HB) distances (in angstrom), in cyclic (HF)<sub>m</sub>(H<sub>2</sub>O)<sub>n</sub>-A clusters.

**Note:** The correlation coefficients for the plots between O-H..F HB energy by MTA and other indirect measure is small. This may be attributed to the fact that there exists many bifurcated anti-cooperative O-H...F HBs in these clusters. As discussed in main text, the strength of these bifurcated anti-cooperative HBs is much smaller as compared to the ones which are not bifurcated. These smaller HB energies of bifurcated anti-cooperative HBs could be possible reason for deviation from the linearity with other measures of HB strengths.

## A Check on the MTA-Method: How Authentic are Hydrogen Bond Energies?

**Table S11:** Error in the estimation of total energy of cyclic  $(\text{HF})_m(\text{H}_2\text{O})_n$ -A clusters calculated at MP2/aVTZ level of theory. See text for details.

| Conformer<br>A                                    | $\sum E_{\text{HB}}$<br>(a.u.) | $\sum E_{\text{monomer}}$<br>‡<br>(a.u.) | $E_{\text{calculated}}$<br>(a.u.) | $E_{\text{actual}}$<br>(a.u.) | Error<br>(a.u.) | Error<br>(kcal/mol) | Error/HB<br>(kcal/mol) |
|---------------------------------------------------|--------------------------------|------------------------------------------|-----------------------------------|-------------------------------|-----------------|---------------------|------------------------|
| (HF) <sub>1</sub> (H <sub>2</sub> O) <sub>2</sub> | 0.04091                        | -252.99706                               | -253.03797                        | -253.02876                    | 0.00921         | 5.8                 | 1.9                    |
| (HF) <sub>2</sub> (H <sub>2</sub> O) <sub>1</sub> | 0.04268                        | -277.00861                               | -277.05129                        | -277.04050                    | 0.01079         | 6.8                 | 2.3                    |
| (HF) <sub>1</sub> (H <sub>2</sub> O) <sub>3</sub> | 0.06190                        | -329.32384                               | -329.38574                        | -329.37725                    | 0.00849         | 5.3                 | 1.3                    |
| (HF) <sub>2</sub> (H <sub>2</sub> O) <sub>2</sub> | 0.06997                        | -353.33441                               | -353.40434                        | -353.39269                    | 0.01170         | 7.3                 | 1.8                    |
| (HF) <sub>3</sub> (H <sub>2</sub> O) <sub>1</sub> | 0.06969                        | -377.34593                               | -377.41562                        | -377.40249                    | 0.01313         | 8.2                 | 2.1                    |
| (HF) <sub>1</sub> (H <sub>2</sub> O) <sub>4</sub> | 0.08086                        | -405.65151                               | -405.73237                        | -405.72270                    | 0.00967         | 6.1                 | 1.2                    |
| (HF) <sub>2</sub> (H <sub>2</sub> O) <sub>3</sub> | 0.09303                        | -429.65987                               | -429.75291                        | -429.73852                    | 0.01439         | 9.0                 | 1.8                    |
| (HF) <sub>3</sub> (H <sub>2</sub> O) <sub>2</sub> | 0.09451                        | -453.67189                               | -453.76640                        | -453.75162                    | 0.01478         | 9.3                 | 1.9                    |
| (HF) <sub>4</sub> (H <sub>2</sub> O) <sub>1</sub> | 0.09307                        | -477.68405                               | -477.77713                        | -477.76051                    | 0.01662         | 10.4                | 2.1                    |
| (HF) <sub>1</sub> (H <sub>2</sub> O) <sub>5</sub> | 0.09588                        | -481.97990                               | -482.07578                        | -482.06485                    | 0.01094         | 6.9                 | 1.1                    |
| (HF) <sub>2</sub> (H <sub>2</sub> O) <sub>4</sub> | 0.10498                        | -505.98959                               | -506.09457                        | -506.08161                    | 0.01296         | 8.1                 | 1.4                    |
| (HF) <sub>3</sub> (H <sub>2</sub> O) <sub>3</sub> | 0.11245                        | -529.99951                               | -530.11196                        | -530.09697                    | 0.01499         | 9.4                 | 1.6                    |
| (HF) <sub>4</sub> (H <sub>2</sub> O) <sub>2</sub> | 0.11428                        | -554.01044                               | -554.12472                        | -554.10755                    | 0.01717         | 10.8                | 1.8                    |
| (HF) <sub>5</sub> (H <sub>2</sub> O) <sub>1</sub> | 0.11133                        | -578.02307                               | -578.13440                        | -578.11578                    | 0.01862         | 11.7                | 2.0                    |
| (HF) <sub>1</sub> (H <sub>2</sub> O) <sub>6</sub> | 0.11558                        | -558.30758                               | -558.42316                        | -558.41339                    | 0.00976         | 6.1                 | 0.7                    |
| (HF) <sub>2</sub> (H <sub>2</sub> O) <sub>5</sub> | 0.12726                        | -582.31512                               | -582.44239                        | -582.42781                    | 0.01458         | 9.2                 | 1.1                    |
| (HF) <sub>3</sub> (H <sub>2</sub> O) <sub>4</sub> | 0.13604                        | -606.32462                               | -606.46066                        | -606.44250                    | 0.01815         | 11.4                | 1.3                    |
| (HF) <sub>4</sub> (H <sub>2</sub> O) <sub>3</sub> | 0.13156                        | -630.33771                               | -630.46927                        | -630.45253                    | 0.01675         | 10.5                | 1.5                    |
| (HF) <sub>5</sub> (H <sub>2</sub> O) <sub>2</sub> | 0.13265                        | -654.34911                               | -654.48176                        | -654.46250                    | 0.019266        | 12.1                | 1.7                    |
| (HF) <sub>6</sub> (H <sub>2</sub> O) <sub>1</sub> | 0.12840                        | -678.36224                               | -678.49069                        | -678.47034                    | 0.02030         | 12.7                | 1.8                    |
| (HF) <sub>1</sub> (H <sub>2</sub> O) <sub>7</sub> | 0.15213                        | -634.63316                               | -634.78530                        | -634.76891                    | 0.01639         | 10.3                | 0.9                    |
| (HF) <sub>2</sub> (H <sub>2</sub> O) <sub>6</sub> | 0.15652                        | -658.64126                               | -658.79778                        | -658.78381                    | 0.01397         | 8.8                 | 0.7                    |
| (HF) <sub>3</sub> (H <sub>2</sub> O) <sub>5</sub> | 0.19506                        | -682.64948                               | -682.84453                        | -682.79737                    | 0.04716         | 29.6                | 2.5                    |
| (HF) <sub>4</sub> (H <sub>2</sub> O) <sub>4</sub> | 0.20701                        | -706.65776                               | -706.86478                        | -706.80991                    | 0.05486         | 34.4                | 2.9                    |
| (HF) <sub>5</sub> (H <sub>2</sub> O) <sub>3</sub> | 0.16131                        | -730.67829                               | -730.83960                        | -730.81233                    | 0.02727         | 17.1                | 1.9                    |
| (HF) <sub>6</sub> (H <sub>2</sub> O) <sub>2</sub> | 0.15873                        | -754.68868                               | -754.84740                        | -754.82092                    | 0.02648         | 16.6                | 1.9                    |
| (HF) <sub>7</sub> (H <sub>2</sub> O) <sub>1</sub> | 0.15297                        | -778.70438                               | -778.85736                        | -778.82796                    | 0.02940         | 18.5                | 2.1                    |

‡ Monomer geometries were taken from those in the respective cluster.

In order to authenticate the values of energies of different types of HBs obtained by MTA method, the molecular energy of a given cluster is approximately obtained by adding the sum of monomer energies to the sum of HB energies. For instance, the sum of energies of four HBs (0.06997 a.u.) when subtracted from the sum of energies of monomers (-353.33441 a.u.) in the HF-water cyclic tetramer  $(\text{HF})_2(\text{H}_2\text{O})_2$ -A, yield the calculated energy of -353.40434 a.u. The actual energy of this cluster at the MP2/aVTZ level is -353.39269 a.u. The difference in these two energies (calculated - actual) is moderate (0.01170 a.u.), suggesting that HB energies

calculated with MTA-based method are indeed reliable. The MP2/aVTZ molecular energies of cyclic  $(\text{HF})_m(\text{H}_2\text{O})_n$  clusters estimated in this way are in good agreement with the respective actual energies. The typical absolute error falls between 0.5 to 54 miliHartrees (mHs); see Tables S11 and S12 in SI, respectively for all the cyclic  $(\text{HF})_m(\text{H}_2\text{O})_n$  clusters. Another important result noticed from these Tables is that the error in the estimation of molecular energy of a cluster using the estimated HB energies is, in general, found to be increases with increase in size of these mixed HF-water clusters. Nevertheless, the average error per HB (the total error divided by the number of HB) is small (typically less than 2.9 kcal/mol) for all HF-water mixed clusters studied here.

**Table S12:** Error in the estimation of total energy of cyclic  $(\text{HF})_m(\text{H}_2\text{O})_n$ -B clusters calculated at MP2/aug-cc-pVTZ level of theory. See text for details

| Conformer<br>B                                    | $\sum E_{HB}$<br>(a.u.) | $\sum E_{monomers}$<br>‡<br>(a.u.) | $E_{\text{calculated}}$<br>(a.u.) | $E_{\text{actual}}$<br>(a.u.) | Error<br>(a.u.) | Error<br>(kcal/mol) | Error/HB<br>(kcal/mol) |
|---------------------------------------------------|-------------------------|------------------------------------|-----------------------------------|-------------------------------|-----------------|---------------------|------------------------|
| (HF) <sub>1</sub> (H <sub>2</sub> O) <sub>3</sub> | 0.05348                 | -329.32500                         | -329.37847                        | -329.36845                    | 0.00998         | 6.3                 | 1.6                    |
| (HF) <sub>2</sub> (H <sub>2</sub> O) <sub>2</sub> | 0.06812                 | -353.33422                         | -353.40235                        | -353.39127                    | 0.01108         | 7.0                 | 1.7                    |
| (HF) <sub>3</sub> (H <sub>2</sub> O) <sub>1</sub> | 0.05230                 | -377.34992                         | -377.40221                        | -377.39053                    | 0.01169         | 7.3                 | 1.8                    |
| (HF) <sub>1</sub> (H <sub>2</sub> O) <sub>4</sub> | 0.07424                 | -405.65303                         | -405.72727                        | -405.71947                    | 0.00780         | 4.9                 | 1.0                    |
| (HF) <sub>2</sub> (H <sub>2</sub> O) <sub>3</sub> | 0.09378                 | -429.66063                         | -429.75441                        | -429.73306                    | 0.02135         | 13.4                | 2.2                    |
| (HF) <sub>3</sub> (H <sub>2</sub> O) <sub>2</sub> | 0.09250                 | -453.67188                         | -453.76438                        | -453.74947                    | 0.01490         | 9.4                 | 1.9                    |
| (HF) <sub>4</sub> (H <sub>2</sub> O) <sub>1</sub> | 0.09929                 | -477.68115                         | -477.78043                        | -477.75280                    | 0.02763         | 17.3                | 2.9                    |
| (HF) <sub>1</sub> (H <sub>2</sub> O) <sub>5</sub> | 0.10037                 | -481.97820                         | -482.07857                        | -482.06630                    | 0.01227         | 7.7                 | 1.1                    |
| (HF) <sub>2</sub> (H <sub>2</sub> O) <sub>4</sub> | 0.10346                 | -505.98976                         | -506.09269                        | -506.08269                    | 0.01052         | 6.6                 | 0.9                    |
| (HF) <sub>3</sub> (H <sub>2</sub> O) <sub>3</sub> | 0.11036                 | -529.99947                         | -530.10982                        | -530.09512                    | 0.01470         | 9.2                 | 1.5                    |
| (HF) <sub>4</sub> (H <sub>2</sub> O) <sub>2</sub> | 0.10770                 | -554.01232                         | -554.12002                        | -554.10514                    | 0.01488         | 9.3                 | 1.6                    |
| (HF) <sub>5</sub> (H <sub>2</sub> O) <sub>1</sub> | 0.10343                 | -578.02310                         | -578.12654                        | -578.10858                    | 0.01795         | 11.3                | 1.9                    |
| (HF) <sub>1</sub> (H <sub>2</sub> O) <sub>6</sub> | 0.12289                 | -558.30573                         | -558.42862                        | -558.40839                    | 0.02023         | 12.7                | 1.4                    |
| (HF) <sub>2</sub> (H <sub>2</sub> O) <sub>5</sub> | 0.11705                 | -582.31793                         | -582.43498                        | -582.42327                    | 0.01171         | 7.4                 | 1.1                    |
| (HF) <sub>3</sub> (H <sub>2</sub> O) <sub>4</sub> | 0.13291                 | -606.32552                         | -606.44118                        | -606.44176                    | 0.01662         | 10.5                | 1.3                    |
| (HF) <sub>4</sub> (H <sub>2</sub> O) <sub>3</sub> | 0.13423                 | -630.34001                         | -630.47431                        | -630.45084                    | 0.02348         | 14.7                | 1.8                    |
| (HF) <sub>5</sub> (H <sub>2</sub> O) <sub>2</sub> | 0.12313                 | -654.34992                         | -654.47305                        | -654.45515                    | 0.01790         | 11.2                | 1.6                    |
| (HF) <sub>6</sub> (H <sub>2</sub> O) <sub>1</sub> | 0.13099                 | -678.36645                         | -678.49745                        | -678.47034                    | 0.02710         | 17.0                | 2.1                    |
| (HF) <sub>1</sub> (H <sub>2</sub> O) <sub>7</sub> | 0.14179                 | -634.63583                         | -637.77762                        | -634.75678                    | 0.02085         | 13.1                | 1.3                    |
| (HF) <sub>2</sub> (H <sub>2</sub> O) <sub>6</sub> | 0.15080                 | -658.64537                         | -658.79617                        | -658.77298                    | 0.02318         | 14.6                | 1.5                    |
| (HF) <sub>3</sub> (H <sub>2</sub> O) <sub>5</sub> | 0.15286                 | -682.65337                         | -682.80623                        | -682.78792                    | 0.01830         | 11.5                | 1.3                    |
| (HF) <sub>4</sub> (H <sub>2</sub> O) <sub>4</sub> | 0.16601                 | -706.66480                         | -706.83080                        | -706.80085                    | 0.02996         | 18.8                | 1.9                    |
| (HF) <sub>5</sub> (H <sub>2</sub> O) <sub>3</sub> | 0.15787                 | -730.67714                         | -730.83501                        | -730.81157                    | 0.02349         | 14.7                | 1.6                    |
| (HF) <sub>6</sub> (H <sub>2</sub> O) <sub>2</sub> | 0.15756                 | -754.69108                         | -754.84865                        | -754.82038                    | 0.02826         | 17.7                | 2.0                    |
| (HF) <sub>7</sub> (H <sub>2</sub> O) <sub>1</sub> | 0.14505                 | -778.70171                         | -778.84675                        | -778.82476                    | 0.02199         | 13.8                | 1.7                    |

‡ Monomer geometries were taken from those in the respective cluster.

**Table S13:** Cartesian Coordinates of cyclic (HF)<sub>m</sub>(H<sub>2</sub>O)<sub>n</sub>-A clusters optimized at MP2/aug-cc-pVDZ level of theory along with single point energy at MP2/aug-cc-pVTZ level

**(HF)<sub>1</sub>(H<sub>2</sub>O)<sub>1</sub>-A**

**MP2/aug-cc-pVTZ = -176.6841045 a.u.**

|   |              |              |             |
|---|--------------|--------------|-------------|
| O | -1.244914000 | 0.000368000  | -0.12437500 |
| H | -1.649100000 | 0.765438000  | 0.30679500  |
| H | -1.647791000 | -0.765399000 | 0.30680000  |
| F | 1.408111000  | -0.000356000 | 0.020178000 |
| H | 0.467932000  | -0.000050000 | -0.04951600 |

**(HF)<sub>1</sub>(H<sub>2</sub>O)<sub>2</sub>-A**

**MP2/aug-cc-pVTZ = -253.0287586 a.u.**

|   |              |              |             |
|---|--------------|--------------|-------------|
| O | 1.636242000  | 0.060448000  | 0.10369600  |
| H | 2.377032000  | -0.081664000 | -0.49839900 |
| H | 1.108561000  | -0.755119000 | 0.05301200  |
| O | -0.852903000 | 1.235815000  | -0.12714800 |
| H | 0.122702000  | 1.191890000  | -0.05456600 |
| H | -1.144618000 | 1.756688000  | 0.63218600  |
| F | -0.867229000 | -1.330843000 | 0.00700300  |
| H | -1.042224000 | -0.390985000 | -0.03624300 |

**(HF)<sub>2</sub>(H<sub>2</sub>O)<sub>1</sub>-A**

**MP2/aug-cc-pVTZ = -277.0405054 a.u.**

|   |              |              |              |
|---|--------------|--------------|--------------|
| O | -1.434006000 | -0.600006000 | -0.117583000 |
| H | -0.678133000 | -1.209325000 | -0.059621000 |
| H | -2.020276000 | -0.850507000 | 0.608660000  |
| F | 0.077986000  | 1.444108000  | 0.010096000  |
| H | -0.637981000 | 0.803828000  | -0.024830000 |
| F | 1.433548000  | -0.783221000 | 0.016242000  |
| H | 1.205275000  | 0.130514000  | 0.017950000  |

**(HF)<sub>1</sub>(H<sub>2</sub>O)<sub>3</sub>-A**

**MP2/aug-cc-pVTZ = -329.3772544 a.u.**

|   |              |              |              |
|---|--------------|--------------|--------------|
| O | 1.521648000  | -1.123411000 | 0.190121000  |
| H | 2.086725000  | -1.761799000 | -0.260525000 |
| H | 0.608571000  | -1.444067000 | 0.053723000  |
| O | 1.115843000  | 1.588886000  | 0.014202000  |
| H | 1.544340000  | 2.007631000  | -0.742367000 |
| H | 1.447197000  | 0.663207000  | 0.021154000  |
| O | -1.528712000 | 1.009260000  | -0.021754000 |
| H | -0.601297000 | 1.353186000  | -0.007624000 |
| H | -1.942066000 | 1.349777000  | 0.781887000  |
| F | -1.194292000 | -1.484933000 | -0.124913000 |
| H | -1.400397000 | -0.536890000 | -0.080163000 |

**(HF)<sub>2</sub>(H<sub>2</sub>O)<sub>2</sub>-A**

**MP2/aug-cc-pVTZ = -353.3926877 a.u.**

|   |              |              |              |
|---|--------------|--------------|--------------|
| O | 1.662044000  | 0.782523000  | -0.107946000 |
| H | 0.817640000  | 1.277160000  | -0.056868000 |
| H | 2.212011000  | 1.133639000  | 0.603837000  |
| O | -1.662047000 | -0.782541000 | -0.107764000 |
| H | -0.817641000 | -1.277169000 | -0.056625000 |
| H | -2.211993000 | -1.133536000 | 0.604094000  |
| F | 0.922839000  | -1.626039000 | 0.009922000  |
| H | 1.292601000  | -0.730198000 | -0.023679000 |
| F | -0.922839000 | 1.626041000  | 0.009671000  |
| H | -1.292601000 | 0.730194000  | -0.023765000 |

**(HF)<sub>3</sub>(H<sub>2</sub>O)<sub>1</sub>-A****MP2/aug-cc-pVTZ = -377.4024912 a.u.**

|   |              |              |              |
|---|--------------|--------------|--------------|
| O | 1.707122000  | 0.679204000  | -0.099602000 |
| H | 0.913210000  | 1.249376000  | -0.057468000 |
| H | 2.274226000  | 0.964516000  | 0.628686000  |
| F | -0.852185000 | 1.663441000  | -0.017793000 |
| H | -1.273710000 | 0.812719000  | 0.004624000  |
| F | -1.631881000 | -0.770543000 | 0.042057000  |
| H | -0.782243000 | -1.212518000 | 0.015782000  |
| F | 0.728322000  | -1.610361000 | -0.022545000 |
| H | 1.198985000  | -0.751366000 | -0.041615000 |

**(HF)<sub>1</sub>(H<sub>2</sub>O)<sub>4</sub>-A****MP2/aug-cc-pVTZ = -405.7226973 a.u.**

|   |              |              |              |
|---|--------------|--------------|--------------|
| O | 1.605371000  | -1.638892000 | -0.069855000 |
| H | 1.903374000  | -2.123480000 | -0.849200000 |
| H | 0.646264000  | -1.824386000 | -0.013280000 |
| O | 2.059822000  | 1.048164000  | 0.138021000  |
| H | 2.572068000  | 1.174498000  | 0.946021000  |
| H | 1.950684000  | 0.071984000  | 0.056900000  |
| O | -0.374687000 | 2.219128000  | -0.121539000 |
| H | -0.327306000 | 2.765352000  | -0.915750000 |
| H | 0.532846000  | 1.843264000  | -0.015270000 |
| O | -2.219276000 | 0.274067000  | -0.005242000 |
| H | -1.561724000 | 1.014983000  | -0.059913000 |
| H | -2.769540000 | 0.476861000  | 0.761722000  |
| F | -1.108366000 | -1.963651000 | 0.086925000  |
| H | -1.558075000 | -1.098422000 | 0.055692000  |

**(HF)<sub>2</sub>(H<sub>2</sub>O)<sub>3</sub>-A****MP2/aug-cc-pVTZ = -429.73852 a.u.**

|   |              |              |              |
|---|--------------|--------------|--------------|
| O | -2.020496000 | -0.918223000 | 0.099235000  |
| H | -2.573474000 | -1.240070000 | -0.623689000 |
| H | -1.182353000 | -1.424987000 | 0.030068000  |
| O | 1.074646000  | 1.967792000  | -0.045301000 |
| H | 0.100550000  | 1.905592000  | 0.030510000  |
| H | 1.229772000  | 2.553037000  | -0.796728000 |
| O | 2.185402000  | -0.480856000 | 0.026136000  |
| H | 2.716006000  | -0.514013000 | 0.832317000  |
| H | 1.819409000  | 0.438863000  | -0.011033000 |
| F | 0.357263000  | -2.166985000 | -0.089606000 |
| H | 1.093781000  | -1.523888000 | -0.039391000 |
| F | -1.615109000 | 1.556157000  | 0.153507000  |
| H | -1.798393000 | 0.601229000  | 0.125672000  |

**(HF)<sub>3</sub>(H<sub>2</sub>O)<sub>2</sub>-A****MP2/aug-cc-pVTZ = -453.7516203 a.u.**

|   |              |              |              |
|---|--------------|--------------|--------------|
| O | -1.592857000 | -1.479695000 | -0.055370000 |
| H | -1.972909000 | -1.918903000 | 0.716234000  |
| H | -0.638288000 | -1.712866000 | -0.048083000 |
| O | 2.214739000  | 0.282141000  | 0.098745000  |
| H | 1.564239000  | 1.014334000  | 0.122189000  |
| H | 2.812049000  | 0.493358000  | -0.630126000 |
| F | 1.051379000  | -1.926507000 | -0.041180000 |
| F | -1.940083000 | 0.964799000  | -0.172015000 |
| F | 0.242871000  | 2.151328000  | 0.143625000  |
| H | -0.613510000 | 1.741878000  | 0.023387000  |
| H | 1.534971000  | -1.080970000 | 0.005547000  |

H -1.823987000 -0.012387000 -0.118591000

**(HF)<sub>4</sub>(H<sub>2</sub>O)<sub>1</sub>-A**

**MP2/aug-cc-pVTZ = -477.7605089 a.u.**

O 2.045349000 0.796528000 -0.074984000  
H 1.254712000 1.375287000 -0.077480000  
H 2.588593000 1.097964000 0.664761000  
F 1.408444000 -1.586263000 -0.058582000  
F -1.052521000 -1.836770000 0.018302000  
F -2.132274000 0.423027000 0.067716000  
F -0.297233000 2.166526000 -0.078131000  
H 1.688789000 -0.639130000 -0.056250000  
H -0.090904000 -1.779961000 -0.014636000  
H -1.763332000 -0.460351000 0.049740000  
H -1.028823000 1.559821000 -0.027338000

**(HF)<sub>1</sub>(H<sub>2</sub>O)<sub>5</sub>-A**

**MP2/aug-cc-pVTZ = -482.0648464 a.u.**

O -1.372016000 -2.294777000 0.042873000  
H -1.534482000 -2.873098000 0.797664000  
H -0.398556000 -2.274921000 -0.048808000  
O -2.727956000 0.066089000 -0.152411000  
H -3.229185000 -0.014017000 -0.973007000  
H -2.238948000 -0.785356000 -0.073648000  
O -1.278737000 2.332187000 0.230635000  
H -1.620977000 2.704552000 1.052115000  
H -1.805142000 1.510122000 0.085564000  
O 1.397779000 2.212686000 -0.144221000  
H 0.421787000 2.246625000 0.005569000  
H 1.543431000 2.732470000 -0.944031000  
O 2.676457000 -0.131529000 0.013206000  
H 3.203051000 -0.060849000 0.818917000  
H 2.181075000 0.725416000 -0.052337000  
F 1.353010000 -2.236300000 -0.174699000  
H 1.860526000 -1.406210000 -0.097082000

**(HF)<sub>2</sub>(H<sub>2</sub>O)<sub>4</sub>-A**

**MP2/aug-cc-pVTZ = -506.0816119 a.u.**

O 1.211657000 -2.281979000 -0.078809000  
H 1.328763000 -2.854378000 -0.846599000  
H 0.242545000 -2.227703000 0.048921000  
O 2.680037000 -0.040764000 0.078992000  
H 3.156447000 -0.119156000 0.914845000  
H 2.127752000 -0.859920000 0.013667000  
O -2.680053000 0.040746000 -0.078878000  
H -3.156414000 0.119276000 -0.914749000  
H -2.127740000 0.859881000 -0.013458000  
O -1.211685000 2.281961000 0.078760000  
H -1.328803000 2.854540000 0.846414000  
H -1.946623000 -1.270373000 0.117120000  
F -1.480291000 -2.117681000 0.253170000  
H -0.242574000 2.227679000 -0.048965000  
F 1.480267000 2.117595000 -0.253303000  
H 1.946629000 1.270320000 -0.117123000

**(HF)<sub>3</sub>(H<sub>2</sub>O)<sub>3</sub>-A****MP2/aug-cc-pVTZ = -530.0969724 a.u.**

|   |              |              |              |
|---|--------------|--------------|--------------|
| O | -2.029332000 | -1.623828000 | 0.156199000  |
| H | -2.279846000 | -2.059793000 | 0.980413000  |
| H | -1.109049000 | -1.915433000 | -0.019780000 |
| O | -0.332441000 | 2.419129000  | -0.523576000 |
| H | -1.104679000 | 1.855095000  | -0.300421000 |
| H | -0.603038000 | 3.320193000  | -0.306976000 |
| O | 2.449784000  | -0.915927000 | 0.039142000  |
| H | 2.233389000  | 0.026371000  | 0.208133000  |
| H | 3.079794000  | -0.904451000 | -0.692419000 |
| F | -2.405553000 | 0.837316000  | 0.114377000  |
| H | -2.257883000 | -0.128649000 | 0.135055000  |
| F | 1.811794000  | 1.655728000  | 0.490654000  |
| H | 0.969374000  | 1.970438000  | 0.109740000  |
| F | 0.494869000  | -2.423149000 | -0.306367000 |
| H | 1.257862000  | -1.827815000 | -0.175833000 |

**(HF)<sub>4</sub>(H<sub>2</sub>O)<sub>2</sub>-A****MP2/aug-cc-pVTZ = -554.1075485 a.u.**

|   |              |              |              |
|---|--------------|--------------|--------------|
| O | 2.135840000  | 0.827425000  | 1.068880000  |
| H | 2.711065000  | 0.847001000  | 1.844336000  |
| H | 1.245436000  | 1.076806000  | 1.395133000  |
| O | -2.135840000 | -0.827425000 | -1.068880000 |
| H | -1.245436000 | -1.076806000 | -1.395133000 |
| H | -2.711065000 | -0.847001000 | -1.844336000 |
| F | 2.188656000  | -1.260687000 | -0.248938000 |
| H | 2.173994000  | -0.435759000 | 0.289648000  |
| F | 0.348324000  | -1.447326000 | -1.926995000 |
| H | 1.070102000  | -1.387797000 | -1.300514000 |
| F | -2.188656000 | 1.260687000  | 0.248938000  |
| H | -2.173994000 | 0.435759000  | -0.289648000 |
| F | -0.348324000 | 1.447326000  | 1.926995000  |
| H | -1.070102000 | 1.387797000  | 1.300514000  |

**(HF)<sub>5</sub>(H<sub>2</sub>O)<sub>1</sub>-A****MP2/aug-cc-pVTZ = -578.1157831 a.u.**

|   |              |              |              |
|---|--------------|--------------|--------------|
| O | 2.180445000  | 1.321034000  | -0.045729000 |
| H | 1.302256000  | 1.752573000  | -0.090460000 |
| H | 2.593019000  | 1.648927000  | 0.763675000  |
| F | 2.187098000  | -1.116418000 | -0.349400000 |
| H | 2.186139000  | -0.134769000 | -0.218316000 |
| F | 0.189717000  | -2.289121000 | 0.479833000  |
| H | 0.984767000  | -1.847661000 | 0.152766000  |
| F | -1.958660000 | -1.379902000 | -0.388273000 |
| H | -1.139062000 | -1.760932000 | -0.065292000 |
| F | -2.302613000 | 1.012376000  | 0.277366000  |
| H | -2.202825000 | 0.094645000  | 0.026895000  |
| F | -0.273695000 | 2.462218000  | -0.163437000 |
| H | -1.053226000 | 1.939359000  | -0.006575000 |



**(HF)<sub>1</sub>(H<sub>2</sub>O)<sub>6</sub>-A****MP2/aug-cc-pVTZ = -558.4133976 a.u.**

|   |              |              |              |
|---|--------------|--------------|--------------|
| O | -1.225805000 | -0.291167000 | 1.740797000  |
| H | -1.430780000 | -0.523629000 | 2.654703000  |
| H | -2.091680000 | -0.242289000 | 1.271550000  |
| O | 0.209897000  | -1.763375000 | -0.227672000 |
| H | -0.199306000 | -1.227778000 | -0.935003000 |
| H | -0.216012000 | -1.414566000 | 0.580515000  |
| O | -3.268277000 | -0.108307000 | -0.052695000 |
| H | -2.660761000 | 0.068061000  | -0.802644000 |
| H | -3.908043000 | 0.614312000  | -0.074874000 |
| O | -1.085672000 | 0.282209000  | -1.722049000 |
| H | -0.611693000 | 0.942842000  | -1.140971000 |
| H | -0.981510000 | 0.591881000  | -2.630006000 |
| O | 0.033525000  | 1.785226000  | 0.150921000  |
| H | -0.284599000 | 1.283771000  | 0.922482000  |
| H | 1.011921000  | 1.717621000  | 0.207855000  |
| O | 2.750960000  | 1.307365000  | 0.350588000  |
| H | 2.860235000  | 0.359441000  | 0.133557000  |
| H | 3.486323000  | 1.755018000  | -0.083763000 |
| F | 2.669032000  | -1.368320000 | -0.205074000 |
| H | 1.706774000  | -1.553853000 | -0.212631000 |

**(HF)<sub>2</sub>(H<sub>2</sub>O)<sub>5</sub>-A****MP2/aug-cc-pVTZ = -582.427812 a.u.**

|   |              |              |              |
|---|--------------|--------------|--------------|
| O | -0.571357000 | 1.327873000  | 1.038619000  |
| H | -1.390668000 | 1.454826000  | 0.505248000  |
| H | -0.505035000 | 0.359276000  | 1.147767000  |
| O | -2.865643000 | 1.365008000  | -0.468455000 |
| H | -2.930687000 | 0.406257000  | -0.666064000 |
| H | -2.880296000 | 1.803401000  | -1.328157000 |
| O | -2.724603000 | -1.401433000 | -0.571313000 |
| H | -1.907156000 | -1.587799000 | -0.067808000 |
| H | -2.731694000 | -2.042987000 | -1.291766000 |
| O | -0.404264000 | -1.515499000 | 1.020419000  |
| H | -0.393326000 | -2.023574000 | 1.841562000  |
| H | 0.437718000  | -1.740423000 | 0.566024000  |
| O | 3.123800000  | 0.176106000  | -0.491035000 |
| H | 3.563756000  | 0.352695000  | -1.331876000 |
| H | 2.541178000  | 0.955726000  | -0.329759000 |
| F | 1.454720000  | 2.179102000  | -0.033143000 |
| H | 0.615800000  | 1.855294000  | 0.401968000  |
| F | 1.868647000  | -1.956871000 | -0.325253000 |
| H | 2.382299000  | -1.124802000 | -0.414181000 |

**(HF)<sub>3</sub>(H<sub>2</sub>O)<sub>4</sub>-A****MP2/aug-cc-pVTZ = -606.4425054 a.u.**

|   |              |              |              |
|---|--------------|--------------|--------------|
| O | -0.205592000 | 1.803058000  | -0.340024000 |
| H | 0.180400000  | 1.178612000  | -0.978147000 |
| H | 0.274523000  | 1.600784000  | 0.480199000  |
| O | -2.798142000 | 1.152272000  | 0.055037000  |
| H | -3.368277000 | 1.561844000  | -0.607337000 |
| H | -1.880525000 | 1.473933000  | -0.132530000 |
| O | -0.003325000 | -1.668355000 | 0.214999000  |
| H | -0.984840000 | -1.633572000 | 0.237135000  |
| H | 0.292503000  | -1.182934000 | 1.003438000  |
| O | 3.167874000  | -0.026885000 | -0.070992000 |
| H | 2.600532000  | -0.171735000 | -0.855179000 |
| H | 3.819708000  | 0.638038000  | -0.326461000 |
| F | -2.676915000 | -1.333934000 | 0.214066000  |
| H | -2.792184000 | -0.367629000 | 0.134494000  |
| F | 1.007045000  | -0.469139000 | -1.648282000 |
| H | 0.558768000  | -1.012015000 | -0.928960000 |
| F | 1.410689000  | 0.399627000  | 1.668671000  |
| H | 2.167550000  | 0.279643000  | 1.071398000  |

**(HF)<sub>4</sub>(H<sub>2</sub>O)<sub>3</sub>-A****MP2/aug-cc-pVTZ = -630.4525265 a.u.**

|   |              |              |              |
|---|--------------|--------------|--------------|
| O | 0.208325000  | 2.553673000  | 0.655630000  |
| H | -0.601375000 | 2.287503000  | 0.168176000  |
| H | 0.160228000  | 3.515176000  | 0.727608000  |
| O | -3.012833000 | -0.392113000 | -0.016149000 |
| H | -2.367809000 | -1.064347000 | 0.286245000  |
| H | -3.533119000 | -0.828980000 | -0.702303000 |
| O | 2.760242000  | -0.986808000 | -0.028172000 |
| H | 2.607940000  | -0.018568000 | -0.102465000 |
| H | 3.142631000  | -1.121988000 | 0.848005000  |
| F | -1.989771000 | 1.785491000  | -0.675015000 |
| H | -2.392771000 | 0.931882000  | -0.427212000 |
| F | -1.180145000 | -2.202665000 | 0.826875000  |
| H | -0.392691000 | -2.307419000 | 0.291183000  |
| F | 0.856502000  | -2.438415000 | -0.586597000 |
| H | 1.617088000  | -1.849525000 | -0.355688000 |
| F | 2.354151000  | 1.644675000  | -0.213235000 |
| H | 1.507737000  | 2.015311000  | 0.106095000  |

**(HF)<sub>5</sub>(H<sub>2</sub>O)<sub>2</sub>-A****MP2/aug-cc-pVTZ = -654.4624961 a.u.**

|   |              |              |              |
|---|--------------|--------------|--------------|
| O | -2.161859000 | -1.792392000 | -0.540497000 |
| H | -2.799007000 | -2.450084000 | -0.233621000 |
| H | -1.322222000 | -1.999085000 | -0.077491000 |
| O | 2.943917000  | 0.707740000  | -0.176062000 |
| H | 3.433603000  | 0.974492000  | 0.612332000  |
| H | 2.213110000  | 1.354223000  | -0.263103000 |
| F | 0.137818000  | -2.245137000 | 0.778340000  |
| H | 0.981025000  | -2.042235000 | 0.368802000  |
| F | 2.311189000  | -1.673217000 | -0.287865000 |
| H | 2.560315000  | -0.720553000 | -0.236592000 |
| F | 0.918833000  | 2.486817000  | -0.422944000 |
| H | 0.089373000  | 2.332385000  | 0.020855000  |
| F | -1.236386000 | 2.030772000  | 0.795558000  |
| H | -1.880693000 | 1.463783000  | 0.356840000  |
| F | -2.861923000 | 0.554573000  | -0.334496000 |
| H | -2.589893000 | -0.394804000 | -0.405565000 |

**(HF)<sub>6</sub>(H<sub>2</sub>O)<sub>1</sub>-A****MP2/aug-cc-pVTZ = -678.4703356 a.u.**

|   |              |              |              |
|---|--------------|--------------|--------------|
| O | 2.955779000  | 0.431700000  | -0.176663000 |
| H | 2.312993000  | 1.168365000  | -0.238233000 |
| H | 3.492716000  | 0.615380000  | 0.604845000  |
| F | 2.021329000  | -1.829391000 | -0.336905000 |
| H | 2.396825000  | -0.914083000 | -0.262643000 |
| F | -0.104288000 | -2.198530000 | 0.830341000  |
| H | 0.737611000  | -2.068997000 | 0.370855000  |
| F | -2.184295000 | -1.723109000 | -0.442404000 |
| H | -1.379939000 | -1.940864000 | 0.034913000  |
| F | -2.766646000 | 0.705631000  | -0.415225000 |
| H | -2.564058000 | -0.231248000 | -0.426180000 |
| F | -1.091596000 | 2.143927000  | 0.768841000  |
| H | -1.745686000 | 1.608724000  | 0.320688000  |
| F | 1.152465000  | 2.439973000  | -0.362875000 |
| H | 0.298083000  | 2.353646000  | 0.046405000  |

**(HF)<sub>1</sub>(H<sub>2</sub>O)<sub>7</sub>-A****MP2/aug-cc-pVTZ = -634.7689147 a.u.**

|   |              |              |              |
|---|--------------|--------------|--------------|
| O | -2.049908000 | -0.071736000 | -1.395971000 |
| H | -2.913932000 | 0.023262000  | -1.815269000 |
| H | -2.005664000 | 0.626510000  | -0.686843000 |
| O | -0.958241000 | -1.997972000 | 0.311888000  |
| H | -1.455964000 | -1.483751000 | -0.358405000 |
| H | -0.064375000 | -2.099444000 | -0.078907000 |
| O | -1.577909000 | 1.633483000  | 0.599741000  |
| H | -1.404103000 | 1.053023000  | 1.361474000  |
| H | -0.700435000 | 2.014032000  | 0.395679000  |
| O | 1.100601000  | 2.200054000  | -0.131340000 |
| H | 1.637379000  | 2.996634000  | -0.038099000 |
| H | 1.503789000  | 1.523539000  | 0.476165000  |
| O | 1.909971000  | 0.150233000  | 1.392862000  |
| H | 1.130308000  | -0.090917000 | 1.923629000  |
| H | 1.992578000  | -0.587437000 | 0.758555000  |
| O | 1.604832000  | -1.715813000 | -0.746367000 |
| H | 2.190974000  | -2.317660000 | -1.221174000 |
| H | 1.341272000  | -1.008603000 | -1.397300000 |
| O | 0.663959000  | 0.304795000  | -2.209763000 |
| H | 0.856663000  | 1.094937000  | -1.668076000 |
| H | -0.306621000 | 0.215483000  | -2.152781000 |
| F | -0.724436000 | -0.538514000 | 2.279206000  |
| H | -0.845766000 | -1.168328000 | 1.517554000  |

**(HF)<sub>2</sub>(H<sub>2</sub>O)<sub>6</sub>-A****MP2/aug-cc-pVTZ = -658.7838148 a.u.**

|   |              |              |              |
|---|--------------|--------------|--------------|
| O | 1.797931000  | 1.633215000  | -0.351116000 |
| H | 2.597880000  | 2.143185000  | -0.529328000 |
| H | 2.005265000  | 0.692972000  | -0.601881000 |
| O | 0.505453000  | 0.853617000  | 1.995045000  |
| H | 1.029173000  | 1.291364000  | 1.290507000  |
| H | -0.425135000 | 1.060694000  | 1.768213000  |
| O | -2.037007000 | 1.081813000  | 0.848888000  |
| H | -2.824559000 | 1.605462000  | 1.041749000  |
| H | -1.696980000 | 1.395135000  | -0.034192000 |
| O | -0.826123000 | 1.632251000  | -1.455828000 |
| H | -0.791966000 | 0.774406000  | -1.914442000 |
| H | 0.104761000  | 1.800245000  | -1.211277000 |
| O | -1.590671000 | -1.607062000 | 0.195284000  |
| H | -0.849341000 | -1.801827000 | 0.799825000  |
| H | -1.937643000 | -0.748792000 | 0.515962000  |
| O | 1.985758000  | -0.981007000 | -0.876245000 |
| H | 1.766972000  | -1.405234000 | -0.028529000 |
| H | 1.217238000  | -1.184505000 | -1.438649000 |
| F | 0.782977000  | -1.564656000 | 1.677721000  |
| H | 0.696229000  | -0.586941000 | 1.862447000  |
| F | -0.617734000 | -1.174210000 | -2.030596000 |
| H | -1.043732000 | -1.391609000 | -1.160937000 |

**(HF)<sub>3</sub>(H<sub>2</sub>O)<sub>5</sub>-A****MP2/aug-cc-pVTZ = -682.7973725 a.u.**

|   |              |              |              |
|---|--------------|--------------|--------------|
| O | 1.841245000  | -0.002124000 | 1.510673000  |
| H | 1.267501000  | 0.763727000  | 1.686548000  |
| H | 1.266548000  | -0.767562000 | 1.685252000  |
| O | 2.147804000  | -0.000242000 | -1.140203000 |
| H | 2.196807000  | -0.001008000 | -0.145793000 |
| H | 3.058590000  | -0.000494000 | -1.460611000 |
| O | 0.122117000  | -1.919951000 | -1.185095000 |
| H | 0.905412000  | -1.352310000 | -1.344874000 |
| H | -0.628813000 | -1.398292000 | -1.523877000 |
| O | -2.074656000 | 0.000366000  | 0.985786000  |
| H | -1.557520000 | -0.770521000 | 1.288251000  |
| H | -1.556688000 | 0.770241000  | 1.289410000  |
| O | 0.124146000  | 1.921672000  | -1.182168000 |
| H | 0.906823000  | 1.353430000  | -1.342830000 |
| H | -0.627349000 | 1.401362000  | -1.521766000 |
| F | -0.175475000 | -2.032110000 | 1.258180000  |
| H | -0.048615000 | -2.053194000 | 0.271601000  |
| F | -1.919318000 | 0.002124000  | -1.468891000 |
| H | -2.052359000 | 0.001464000  | -0.480562000 |
| F | -0.173399000 | 2.030432000  | 1.261281000  |
| H | -0.046458000 | 2.052874000  | 0.274749000  |

**(HF)<sub>4</sub>(H<sub>2</sub>O)<sub>4</sub>-A****MP2/aug-cc-pVTZ = -706.8099142 a.u.**

|   |              |              |              |
|---|--------------|--------------|--------------|
| O | -0.218971000 | -1.948088000 | 1.195587000  |
| H | 0.606289000  | -1.497623000 | 1.455741000  |
| H | -0.923668000 | -1.325873000 | 1.456155000  |
| O | 1.948088000  | -0.218972000 | -1.195591000 |
| H | 1.325874000  | -0.923670000 | -1.456158000 |
| H | 1.497623000  | 0.606287000  | -1.455744000 |
| O | -1.948091000 | 0.218973000  | -1.195584000 |
| H | -1.497622000 | -0.606286000 | -1.455736000 |
| H | -1.325879000 | 0.923673000  | -1.456154000 |
| O | 0.218975000  | 1.948090000  | 1.195587000  |
| H | -0.606283000 | 1.497622000  | 1.455740000  |
| H | 0.923675000  | 1.325878000  | 1.456156000  |
| F | -0.224940000 | -2.001337000 | -1.265766000 |
| H | -0.230871000 | -2.050738000 | -0.271184000 |
| F | 2.001342000  | -0.224937000 | 1.265763000  |
| H | 2.050740000  | -0.230872000 | 0.271182000  |
| F | -2.001335000 | 0.224938000  | 1.265769000  |
| H | -2.050738000 | 0.230875000  | 0.271187000  |
| F | 0.224936000  | 2.001339000  | -1.265767000 |
| H | 0.230875000  | 2.050739000  | -0.271186000 |

**(HF)<sub>5</sub>(H<sub>2</sub>O)<sub>3</sub>-A****MP2/aug-cc-pVTZ = -730.8123317 a.u.**

|   |              |              |              |
|---|--------------|--------------|--------------|
| O | -0.485414000 | -0.013182000 | 0.079307000  |
| H | 0.082938000  | 0.789190000  | 0.083664000  |
| H | -1.052865000 | 0.049042000  | -0.723066000 |
| O | -4.202823000 | -0.075340000 | -0.100254000 |
| H | -4.838678000 | 0.649342000  | -0.041823000 |
| H | -3.714839000 | -0.068811000 | 0.747985000  |
| O | 3.605510000  | -1.220163000 | -0.058996000 |
| H | 4.017974000  | -1.642082000 | -0.823688000 |
| H | 2.701177000  | -1.596447000 | -0.004798000 |
| F | 1.038864000  | -2.043494000 | 0.088796000  |
| H | 0.427846000  | -1.295468000 | 0.073400000  |
| F | -2.317267000 | -0.084382000 | 1.882264000  |
| H | -1.563036000 | -0.044629000 | 1.290240000  |
| F | -2.367800000 | 0.051135000  | -1.807623000 |
| H | -3.139886000 | 0.017726000  | -1.216669000 |
| F | 1.208492000  | 2.055012000  | 0.160941000  |
| H | 2.125945000  | 1.791006000  | 0.075034000  |
| F | 3.559853000  | 1.251109000  | -0.073215000 |
| H | 3.603546000  | 0.266703000  | -0.078175000 |

**(HF)<sub>6</sub>(H<sub>2</sub>O)<sub>2</sub>-A****MP2/aug-cc-pVTZ = -754.8209233 a.u.**

|   |              |              |              |
|---|--------------|--------------|--------------|
| O | 0.148042000  | 1.414997000  | 1.125051000  |
| H | -0.680697000 | 1.741250000  | 0.722068000  |
| H | 0.032287000  | 0.451813000  | 1.212329000  |
| O | -0.047370000 | -1.472403000 | 1.139533000  |
| H | 0.055303000  | -1.918078000 | 1.992144000  |
| H | 0.746092000  | -1.728779000 | 0.611751000  |
| F | 2.216255000  | 2.006397000  | -0.022075000 |
| H | 1.355616000  | 1.784714000  | 0.437969000  |
| F | 3.328725000  | 0.040430000  | -0.968890000 |
| H | 2.914649000  | 0.841881000  | -0.612730000 |
| F | 2.092093000  | -2.016282000 | -0.313816000 |
| H | 2.596562000  | -1.246531000 | -0.588104000 |
| F | -2.236192000 | -1.978068000 | -0.008823000 |
| H | -1.385692000 | -1.818718000 | 0.428016000  |
| F | -3.274338000 | 0.047544000  | -1.095253000 |
| H | -2.909307000 | -0.743797000 | -0.707249000 |
| F | -2.241197000 | 2.123584000  | -0.028466000 |
| H | -2.672567000 | 1.395974000  | -0.458105000 |

**(HF)<sub>7</sub>(H<sub>2</sub>O)<sub>1</sub>-A**

**MP2/aug-cc-pVTZ = -778.827959 a.u.**

|   |              |              |              |
|---|--------------|--------------|--------------|
| O | 0.465253000  | 0.036458000  | -0.014263000 |
| H | -0.107833000 | 0.837371000  | -0.020105000 |
| H | 1.033677000  | 0.099686000  | 0.785736000  |
| F | -1.033017000 | -1.993671000 | -0.023779000 |
| H | -0.431183000 | -1.231868000 | -0.005864000 |
| F | -3.446031000 | -1.341125000 | 0.084182000  |
| H | -2.536151000 | -1.638836000 | 0.043423000  |
| F | -3.607595000 | 1.165352000  | 0.067132000  |
| H | -3.605231000 | 0.209062000  | 0.075082000  |
| F | -1.255697000 | 2.062777000  | -0.114765000 |
| H | -2.165125000 | 1.783298000  | -0.047365000 |
| F | 2.417726000  | 0.077964000  | 1.823491000  |
| H | 3.168999000  | 0.052730000  | 1.241355000  |
| F | 4.152447000  | 0.003667000  | -0.042158000 |
| H | 3.571402000  | -0.015127000 | -0.798234000 |
| F | 2.311434000  | -0.031807000 | -1.778997000 |
| H | 1.540041000  | 0.009414000  | -1.202393000 |

**Table S14:** Cartesian coordinates of cyclic  $(\text{HF})_m(\text{H}_2\text{O})_n\text{-B}$  clusters optimized at MP2/aug-cc-pVDZ level of theory along with single point energy at MP2/aug-cc-pVTZ level

**$(\text{HF})_1(\text{H}_2\text{O})_3\text{-B}$**

**MP2/aug-cc-pVTZ = -329.368492 a.u.**

|   |              |              |              |
|---|--------------|--------------|--------------|
| O | -1.931445000 | -1.216400000 | -0.330703000 |
| H | -2.787544000 | -1.564646000 | -0.053320000 |
| H | -2.079156000 | -0.263365000 | -0.461245000 |
| O | 0.312378000  | -0.068266000 | 0.935161000  |
| H | -0.243302000 | -0.826312000 | 0.676294000  |
| H | 1.173381000  | -0.205874000 | 0.495732000  |
| O | 2.829732000  | -0.291385000 | -0.348260000 |
| H | 2.885162000  | 0.211014000  | -1.172267000 |
| H | 3.595872000  | -0.001087000 | 0.164290000  |
| F | -1.247663000 | 1.553341000  | -0.209371000 |
| H | -0.573914000 | 1.043539000  | 0.263902000  |

**$(\text{HF})_2(\text{H}_2\text{O})_2\text{-B}$**

**MP2/aug-cc-pVTZ = -353.3912671 a.u.**

|   |              |              |              |
|---|--------------|--------------|--------------|
| O | -0.041054000 | 1.816402000  | -0.050786000 |
| H | -0.099079000 | 2.380413000  | 0.731344000  |
| H | -0.837067000 | 1.230515000  | -0.019593000 |
| O | -1.919944000 | -0.124914000 | 0.049241000  |
| H | -1.321687000 | -0.896597000 | 0.055212000  |
| H | -2.555910000 | -0.304263000 | -0.654427000 |
| F | 0.251560000  | -1.859413000 | 0.089149000  |
| H | 0.921329000  | -1.185627000 | 0.016653000  |
| F | 1.794840000  | 0.141374000  | -0.094042000 |
| H | 1.131681000  | 0.865206000  | -0.069433000 |

**$(\text{HF})_3(\text{H}_2\text{O})_1\text{-B}$**

**MP2/aug-cc-pVTZ = -377.39053 a.u.**

|   |              |              |              |
|---|--------------|--------------|--------------|
| O | 0.469951000  | -0.105834000 | 0.786260000  |
| H | 0.622919000  | -0.187970000 | 1.738354000  |
| H | -0.100991000 | -0.860881000 | 0.546679000  |
| F | -1.827343000 | -1.199986000 | -0.322941000 |
| H | -1.984831000 | -0.278387000 | -0.428523000 |
| F | -1.454526000 | 1.390336000  | -0.169048000 |
| H | -0.652972000 | 1.085240000  | 0.237842000  |
| F | 2.868135000  | -0.061929000 | -0.478172000 |
| H | 2.021336000  | -0.081819000 | -0.076847000 |

**$(\text{HF})_1(\text{H}_2\text{O})_4\text{-B}$**

**MP2/aug-cc-pVTZ = -405.719471 a.u.**

|   |              |              |              |
|---|--------------|--------------|--------------|
| O | -0.322655000 | -1.729056000 | 0.622854000  |
| H | -0.981092000 | -1.777524000 | -0.088322000 |
| H | -0.573560000 | -0.905260000 | 1.073095000  |
| O | 2.147325000  | -0.954336000 | -0.301967000 |
| H | 2.854633000  | -1.394451000 | 0.184541000  |
| H | 1.311406000  | -1.364250000 | 0.020515000  |
| O | 1.449338000  | 1.669168000  | -0.210714000 |
| H | 1.513276000  | 2.011039000  | -1.111521000 |
| H | 1.831016000  | 0.759482000  | -0.259087000 |
| O | -0.968769000 | 1.131630000  | 0.788883000  |
| H | -0.097771000 | 1.443623000  | 0.424280000  |
| H | -1.326464000 | 1.862712000  | 1.307020000  |
| F | -2.316689000 | -0.189385000 | -0.955941000 |
| H | -1.884397000 | 0.401939000  | -0.344332000 |

**(HF)<sub>2</sub>(H<sub>2</sub>O)<sub>3</sub>-B**

MP2/aug-cc-pVTZ = -429.7330597 a.u.

|   |              |              |              |
|---|--------------|--------------|--------------|
| O | -2.451832000 | -0.001437000 | -0.892883000 |
| H | -2.178156000 | -0.816335000 | -0.443422000 |
| H | -3.394932000 | -0.113379000 | -1.064793000 |
| O | -0.621707000 | 1.162781000  | 0.878675000  |
| H | 0.204082000  | 1.476231000  | 0.458340000  |
| H | -1.311331000 | 1.235522000  | 0.193289000  |
| O | 1.929305000  | -1.134753000 | -0.335390000 |
| H | 1.947313000  | -1.578575000 | -1.192881000 |
| H | 1.083577000  | -1.401335000 | 0.079053000  |
| F | 1.838902000  | 1.402257000  | -0.332957000 |
| H | 1.947872000  | 0.443939000  | -0.379674000 |
| F | -0.517280000 | -1.293279000 | 0.891183000  |
| H | -0.540007000 | -0.300657000 | 0.979095000  |

**(HF)<sub>3</sub>(H<sub>2</sub>O)<sub>2</sub>-B**

MP2/aug-cc-pVTZ = -453.7494861 a.u.

|   |              |              |              |
|---|--------------|--------------|--------------|
| O | 1.995099000  | -0.870573000 | 0.070307000  |
| H | 2.477477000  | -1.006845000 | 0.896009000  |
| H | 1.841217000  | 0.107376000  | 0.004565000  |
| O | 1.433482000  | 1.741647000  | -0.084106000 |
| H | 0.470699000  | 1.876515000  | 0.012898000  |
| H | 1.682938000  | 2.255198000  | -0.862393000 |
| F | -0.108285000 | -2.116644000 | -0.124140000 |
| H | 0.753780000  | -1.629376000 | -0.035903000 |
| F | -2.068647000 | -0.603940000 | -0.074016000 |
| H | -1.327422000 | -1.218502000 | -0.097392000 |
| F | -1.302440000 | 1.794319000  | 0.214617000  |
| H | -1.639299000 | 0.910426000  | 0.109838000  |

**(HF)<sub>4</sub>(H<sub>2</sub>O)<sub>1</sub>-B**

MP2/aug-cc-pVTZ = -477.7528015 a.u.

|   |              |              |              |
|---|--------------|--------------|--------------|
| O | -0.466238000 | 1.385051000  | 0.704016000  |
| H | 0.389098000  | 1.565638000  | 0.262626000  |
| H | -1.155076000 | 1.627256000  | 0.063978000  |
| F | -2.539161000 | -0.053962000 | -0.816737000 |
| H | -2.058372000 | -0.701921000 | -0.344939000 |
| F | -0.627497000 | -1.022001000 | 0.798983000  |
| H | -0.557916000 | -0.001561000 | 0.837488000  |
| F | 1.653940000  | -1.404662000 | -0.229466000 |
| H | 0.791561000  | -1.415267000 | 0.176714000  |
| F | 1.993331000  | 1.135677000  | -0.466959000 |
| H | 2.009577000  | 0.188372000  | -0.444811000 |

**(HF)<sub>1</sub>(H<sub>2</sub>O)<sub>5</sub>-B**

MP2/aug-cc-pVTZ = -482.0662984 a.u.

|   |              |              |              |
|---|--------------|--------------|--------------|
| O | 2.034510000  | -1.364542000 | -0.630414000 |
| H | 2.730848000  | -1.938054000 | -0.286603000 |
| H | 1.248399000  | -1.496862000 | -0.028444000 |
| O | -0.048376000 | -1.392764000 | 1.009445000  |
| H | -0.921819000 | -1.518433000 | 0.577294000  |
| H | -0.060330000 | -0.457158000 | 1.276413000  |
| O | 0.191029000  | 1.524221000  | 0.992390000  |
| H | -3.324719000 | -1.553009000 | 0.060951000  |
| H | -2.474471000 | -0.389895000 | -0.499838000 |
| O | -2.469627000 | -1.359350000 | -0.342132000 |
| H | -1.949506000 | 1.758252000  | -1.474795000 |
| H | -1.301155000 | 1.545877000  | -0.092955000 |
| O | -2.120068000 | 1.379641000  | -0.603222000 |
| H | 1.027943000  | 1.495491000  | 0.478870000  |
| H | 0.323726000  | 2.207007000  | 1.661492000  |
| F | 2.377072000  | 1.086392000  | -0.519965000 |
| H | 2.315986000  | 0.106695000  | -0.595359000 |



**(HF)<sub>2</sub>(H<sub>2</sub>O)<sub>4</sub>-B**

MP2/aug-cc-pVTZ = -506.0826946 a.u.

|   |              |              |              |
|---|--------------|--------------|--------------|
| O | 2.093722000  | 1.232126000  | -0.628203000 |
| H | 1.289576000  | 1.451636000  | -0.108407000 |
| H | 1.903927000  | 1.518277000  | -1.530986000 |
| O | -0.131819000 | 1.506714000  | 0.987515000  |
| H | -0.982944000 | 1.502536000  | 0.495963000  |
| H | -0.216918000 | 2.203689000  | 1.649936000  |
| O | -2.042014000 | -1.329255000 | -0.641509000 |
| H | -2.750244000 | -1.904356000 | -0.325567000 |
| H | -1.266080000 | -1.491843000 | -0.038695000 |
| O | 0.042503000  | -1.417420000 | 1.014184000  |
| H | 0.079791000  | -0.486484000 | 1.293942000  |
| H | 0.914208000  | -1.567186000 | 0.603117000  |
| F | 2.521039000  | -1.250561000 | -0.290036000 |
| H | 2.414747000  | -0.308688000 | -0.465687000 |
| F | -2.338625000 | 1.126315000  | -0.490807000 |
| H | -2.300407000 | 0.147461000  | -0.580481000 |

**(HF)<sub>3</sub>(H<sub>2</sub>O)<sub>3</sub>-B**

MP2/aug-cc-pVTZ = -530.0951202 a.u.

|   |              |              |              |
|---|--------------|--------------|--------------|
| O | -2.575241000 | -0.621489000 | -0.182561000 |
| H | -3.133918000 | -0.492689000 | -0.959428000 |
| H | -2.232662000 | 0.277970000  | 0.050309000  |
| O | -1.635045000 | 1.811745000  | 0.448871000  |
| H | -0.728426000 | 2.041076000  | 0.166023000  |
| H | -1.696151000 | 2.117322000  | 1.362152000  |
| O | 1.545274000  | -1.604863000 | 0.622369000  |
| H | 0.688631000  | -1.900930000 | 0.239629000  |
| H | 2.114318000  | -2.384775000 | 0.620548000  |
| F | -0.798107000 | -2.330809000 | -0.416279000 |
| H | -1.511284000 | -1.659635000 | -0.337196000 |
| F | 2.499079000  | 0.422116000  | -0.414464000 |
| H | 2.128779000  | -0.400146000 | -0.017449000 |
| F | 0.927182000  | 2.377902000  | -0.359645000 |
| H | 1.544524000  | 1.649516000  | -0.384674000 |

**(HF)<sub>4</sub>(H<sub>2</sub>O)<sub>2</sub>-B**

MP2/aug-cc-pVTZ = -554.105141 a.u.

|   |              |              |              |
|---|--------------|--------------|--------------|
| O | 0.846384000  | -1.640672000 | -0.664798000 |
| H | 1.445345000  | -1.633437000 | 0.102484000  |
| H | 1.002826000  | -0.763272000 | -1.057939000 |
| O | 1.460991000  | 1.177980000  | -0.738747000 |
| H | 0.637408000  | 1.637121000  | -0.466461000 |
| H | 1.942056000  | 1.805233000  | -1.293339000 |
| F | -1.526030000 | -1.887697000 | -0.067863000 |
| H | -0.564628000 | -1.812893000 | -0.300379000 |
| F | -2.548095000 | 0.309760000  | 0.412699000  |
| H | -2.179977000 | -0.564387000 | 0.236791000  |
| F | -0.902660000 | 2.178087000  | 0.063206000  |
| H | -1.555024000 | 1.495783000  | 0.210016000  |
| F | 2.593771000  | -0.251710000 | 1.099976000  |
| H | 2.262479000  | 0.411497000  | 0.504935000  |

**(HF)<sub>5</sub>(H<sub>2</sub>O)<sub>1</sub>-B**

MP2/aug-cc-pVTZ = -578.1085853 a.u.

|   |              |              |              |
|---|--------------|--------------|--------------|
| O | 1.319012000  | 0.045921000  | 0.772524000  |
| H | 2.088598000  | 0.124905000  | 0.187253000  |
| H | 0.788379000  | 0.856858000  | 0.640459000  |
| F | -0.026697000 | -1.965859000 | 0.452236000  |
| H | 0.540979000  | -1.153225000 | 0.578263000  |
| F | -2.274627000 | -1.406240000 | -0.374704000 |
| H | -1.400039000 | -1.662458000 | -0.050150000 |
| F | -2.541515000 | 1.076724000  | -0.481379000 |
| H | -2.481497000 | 0.120528000  | -0.453678000 |
| F | -0.394447000 | 2.130635000  | 0.367529000  |
| H | -1.223368000 | 1.793995000  | 0.044320000  |
| F | 3.763761000  | 0.059760000  | -0.752838000 |
| H | 4.555697000  | -0.114222000 | -0.303004000 |

**(HF)<sub>1</sub>(H<sub>2</sub>O)<sub>6</sub>-B**

MP2/aug-cc-pVTZ = -558.4083929 a.u.

|   |              |              |              |
|---|--------------|--------------|--------------|
| O | -1.933340000 | 1.630186000  | -0.995179000 |
| H | -1.522648000 | 1.806822000  | -1.851119000 |
| H | -2.145048000 | 0.675619000  | -1.008782000 |
| O | -0.127786000 | 1.679318000  | 1.177015000  |
| H | -0.781014000 | 1.770247000  | 0.452528000  |
| H | -0.333234000 | 0.811999000  | 1.562612000  |
| O | 2.306890000  | 1.767278000  | 0.031258000  |
| H | 1.435105000  | 1.771164000  | 0.503588000  |
| H | 2.880309000  | 2.345308000  | 0.547955000  |
| O | 2.705194000  | -0.757257000 | -0.832800000 |
| H | 2.677191000  | 0.174779000  | -0.503162000 |
| H | 3.571498000  | -1.096674000 | -0.577838000 |
| O | 0.531868000  | -2.105077000 | -0.070897000 |
| H | -0.074323000 | -2.068033000 | -0.825523000 |
| H | 1.353069000  | -1.622500000 | -0.356033000 |
| O | -2.344861000 | -1.133293000 | -0.558907000 |
| H | -3.228236000 | -1.523097000 | -0.570373000 |
| H | -2.075535000 | -1.140063000 | 0.379522000  |
| F | -0.789385000 | -1.093350000 | 1.721219000  |
| H | -0.182392000 | -1.512203000 | 1.049762000  |

**(HF)<sub>2</sub>(H<sub>2</sub>O)<sub>5</sub>-B**

MP2/aug-cc-pVTZ = -582.4232679 a.u.

|   |              |              |              |
|---|--------------|--------------|--------------|
| O | -2.863114000 | -0.886825000 | 0.197856000  |
| H | -2.679254000 | 0.073194000  | 0.371512000  |
| H | -3.724983000 | -0.903866000 | -0.237106000 |
| O | -2.397074000 | 1.707414000  | 0.616580000  |
| H | -1.578810000 | 2.094628000  | 0.224488000  |
| H | -2.447890000 | 2.079305000  | 1.505288000  |
| O | -0.161023000 | 2.807838000  | -0.452790000 |
| H | 0.719646000  | 2.427692000  | -0.264183000 |
| H | -0.135837000 | 3.037756000  | -1.389168000 |
| O | 3.056039000  | -0.547897000 | 0.411570000  |
| H | 2.369478000  | -1.257588000 | 0.347853000  |
| H | 3.758087000  | -0.820881000 | -0.192164000 |
| O | 1.254811000  | -2.532149000 | 0.225737000  |
| H | 0.404970000  | -2.382603000 | -0.236604000 |
| H | 1.024203000  | -3.036767000 | 1.014840000  |
| F | 2.324900000  | 1.814805000  | 0.087299000  |
| H | 2.591282000  | 0.884004000  | 0.206531000  |
| F | -1.085814000 | -2.077398000 | -1.075699000 |
| H | -1.786197000 | -1.597999000 | -0.590154000 |

**(HF)<sub>3</sub>(H<sub>2</sub>O)<sub>4</sub>-B**

MP2/aug-cc-pVTZ = -606.4417651 a.u.

|   |              |              |              |
|---|--------------|--------------|--------------|
| O | 1.081173000  | 1.348708000  | -0.579191000 |
| H | 0.736704000  | 0.538220000  | -0.988175000 |
| H | 1.774401000  | 1.026204000  | 0.025784000  |
| O | -0.888130000 | 2.796158000  | 0.469918000  |
| H | -0.116439000 | 2.295481000  | 0.089789000  |
| H | -0.933090000 | 3.624462000  | -0.024053000 |
| O | -2.187314000 | -1.135173000 | -0.067496000 |
| H | -2.216669000 | -1.582371000 | 0.788219000  |
| H | -2.485397000 | -0.211827000 | 0.109929000  |
| O | 1.920078000  | -2.279795000 | 0.367245000  |
| H | 1.234718000  | -2.059467000 | -0.294436000 |
| H | 2.508176000  | -2.910954000 | -0.066602000 |
| F | -2.897895000 | 1.369323000  | 0.412082000  |
| H | -2.116819000 | 1.973547000  | 0.433886000  |
| F | 2.889570000  | -0.030993000 | 1.074723000  |
| H | 2.584128000  | -0.914663000 | 0.849289000  |
| F | -0.034527000 | -1.253357000 | -1.234633000 |
| H | -0.909672000 | -1.219027000 | -0.762209000 |

**(HF)<sub>4</sub>(H<sub>2</sub>O)<sub>3</sub>-B**

MP2/aug-cc-pVTZ = -630.450837 a.u.

|   |              |              |              |
|---|--------------|--------------|--------------|
| O | 1.808436000  | 1.797334000  | -0.541791000 |
| H | 1.920249000  | 2.686004000  | -0.182894000 |
| H | 2.647588000  | 1.329518000  | -0.357399000 |
| O | 2.059474000  | -1.749017000 | 0.544282000  |
| H | 2.036687000  | -2.551261000 | 0.006812000  |
| H | 1.203552000  | -1.297636000 | 0.387030000  |
| O | -0.066207000 | 0.000494000  | 0.037071000  |
| H | -0.628640000 | 0.253137000  | 0.796287000  |
| H | 0.540190000  | 0.767971000  | -0.141990000 |
| F | 3.800772000  | 0.012478000  | 0.024451000  |
| H | 3.201164000  | -0.718233000 | 0.227284000  |
| F | -2.136318000 | 0.501975000  | 1.766591000  |
| H | -2.825740000 | 0.325777000  | 1.137341000  |
| F | -1.767554000 | -0.518018000 | -1.687287000 |
| H | -1.032421000 | -0.302852000 | -1.066898000 |
| F | -3.701552000 | -0.046940000 | -0.175147000 |
| H | -3.049665000 | -0.253539000 | -0.847715000 |

**(HF)<sub>5</sub>(H<sub>2</sub>O)<sub>2</sub>-B**

MP2/aug-cc-pVTZ = -654.4551504 a.u.

|   |              |              |              |
|---|--------------|--------------|--------------|
| O | -1.776034000 | -0.071985000 | -0.823413000 |
| H | -1.192423000 | -0.857287000 | -0.823474000 |
| H | -2.406763000 | -0.201893000 | -0.098745000 |
| O | 3.130474000  | 0.163342000  | 0.196953000  |
| H | 3.889781000  | 0.327367000  | 0.770452000  |
| H | 2.537242000  | 0.935724000  | 0.316657000  |
| F | -0.652659000 | 2.099948000  | -0.823855000 |
| H | -1.104466000 | 1.213071000  | -0.816871000 |
| F | 1.420477000  | 2.214475000  | 0.532928000  |
| H | 0.615220000  | 2.192712000  | 0.008804000  |
| F | 1.996957000  | -2.010888000 | 0.496742000  |
| H | 2.458677000  | -1.146925000 | 0.393795000  |
| F | -0.115692000 | -2.220299000 | -0.833211000 |
| H | 0.697591000  | -2.164635000 | -0.333956000 |
| F | -3.928041000 | -0.180972000 | 1.099547000  |
| H | -4.761288000 | -0.013364000 | 0.729035000  |

**(HF)<sub>6</sub>(H<sub>2</sub>O)<sub>1</sub>-B**

MP2/aug-cc-pVTZ = -678.4703452 a.u.

|   |              |              |              |
|---|--------------|--------------|--------------|
| O | 0.000005000  | 0.043198000  | 0.000035000  |
| H | -0.585164000 | 0.627791000  | -0.531007000 |
| H | 0.585246000  | 0.628036000  | 0.530729000  |
| F | -2.004484000 | 1.296623000  | -1.271786000 |
| H | -2.736326000 | 0.862160000  | -0.848261000 |
| H | -1.033337000 | -0.811947000 | 0.863485000  |
| H | -3.073283000 | -0.596313000 | 0.598291000  |
| F | -3.678211000 | -0.076072000 | 0.075252000  |
| F | -1.786948000 | -1.255447000 | 1.271573000  |
| F | 1.786796000  | -1.256466000 | -1.270686000 |
| H | 1.033242000  | -0.812599000 | -0.862891000 |
| F | 3.678207000  | -0.076597000 | -0.075087000 |
| H | 3.073214000  | -0.597083000 | -0.597808000 |
| F | 2.004651000  | 1.297140000  | 1.271101000  |
| H | 2.736439000  | 0.862321000  | 0.847845000  |

**(HF)<sub>1</sub>(H<sub>2</sub>O)<sub>7</sub>-B**

MP2/aug-cc-pVTZ = -634.7567758 a.u.

|   |              |              |              |
|---|--------------|--------------|--------------|
| O | 0.979095000  | -1.246737000 | -0.922659000 |
| H | 0.918586000  | -0.281775000 | -1.050072000 |
| H | 0.221241000  | -1.463636000 | -0.343064000 |
| O | 3.376939000  | -1.350775000 | 0.231821000  |
| H | 2.485728000  | -1.433760000 | -0.206353000 |
| H | 3.990389000  | -1.848176000 | -0.323582000 |
| O | 1.232155000  | 1.611270000  | -0.733271000 |
| H | 2.134974000  | 1.594969000  | -0.350427000 |
| H | 1.249282000  | 2.309011000  | -1.399827000 |
| O | -1.198241000 | -1.574609000 | 0.831277000  |
| H | -2.089143000 | -1.582378000 | 0.397575000  |
| H | -1.243050000 | -2.232018000 | 1.536280000  |
| O | -3.595383000 | -1.273795000 | -0.365693000 |
| H | -3.659789000 | -0.287835000 | -0.377084000 |
| H | -3.707625000 | -1.542409000 | -1.286022000 |
| O | -3.429222000 | 1.440062000  | -0.269843000 |
| H | -2.559652000 | 1.508357000  | 0.197391000  |
| H | -4.036366000 | 1.983847000  | 0.246757000  |
| O | -1.035980000 | 1.290918000  | 0.996912000  |
| H | -0.980099000 | 0.326257000  | 1.128050000  |
| H | -0.239983000 | 1.511233000  | 0.478688000  |
| F | 3.678111000  | 1.124238000  | 0.336810000  |
| H | 3.637801000  | 0.146880000  | 0.316826000  |

**(HF)<sub>2</sub>(H<sub>2</sub>O)<sub>6</sub>-B**

MP2/aug-cc-pVTZ = -658.7729858 a.u.

|   |              |              |              |
|---|--------------|--------------|--------------|
| O | -1.009331000 | 1.236292000  | -0.988859000 |
| H | -0.936942000 | 0.271332000  | -1.106725000 |
| H | -0.222083000 | 1.478732000  | -0.464252000 |
| O | -3.360483000 | 1.343043000  | 0.260121000  |
| H | -2.489397000 | 1.427372000  | -0.215106000 |
| H | -3.999661000 | 1.833465000  | -0.272102000 |
| O | -1.224957000 | -1.623040000 | -0.726245000 |
| H | -2.120799000 | -1.602967000 | -0.326233000 |
| H | -1.250904000 | -2.332709000 | -1.379915000 |
| O | 1.009331000  | -1.236292000 | 0.988860000  |
| H | 0.936942000  | -0.271332000 | 1.106726000  |
| H | 0.222083000  | -1.478732000 | 0.464253000  |
| O | 3.360483000  | -1.343043000 | -0.260122000 |
| H | 2.489396000  | -1.427372000 | 0.215106000  |
| H | 3.999661000  | -1.833465000 | 0.272101000  |
| O | 1.224957000  | 1.623040000  | 0.726246000  |
| H | 2.120800000  | 1.602967000  | 0.326233000  |
| H | 1.250905000  | 2.332709000  | 1.379915000  |
| F | -3.636686000 | -1.132058000 | 0.399173000  |
| H | -3.607381000 | -0.154330000 | 0.367088000  |
| F | 3.636686000  | 1.132058000  | -0.399173000 |
| H | 3.607380000  | 0.154329000  | -0.367089000 |

**(HF)<sub>3</sub>(H<sub>2</sub>O)<sub>5</sub>-B**

MP2/aug-cc-pVTZ = -682.787925 a.u.

|   |              |              |              |
|---|--------------|--------------|--------------|
| O | 0.031589000  | 1.458558000  | 1.133276000  |
| H | -0.849003000 | 1.717132000  | 0.772083000  |
| H | 0.004073000  | 0.487832000  | 1.228924000  |
| O | -2.427348000 | 2.100225000  | 0.136476000  |
| H | -2.811244000 | 1.360873000  | -0.373890000 |
| H | -2.520422000 | 2.872762000  | -0.434329000 |
| O | -2.138536000 | -2.157962000 | -0.141625000 |
| H | -1.321528000 | -1.937776000 | 0.358211000  |
| H | -1.879539000 | -2.845844000 | -0.768044000 |
| O | 0.112729000  | -1.395958000 | 1.272037000  |
| H | 0.221506000  | -1.757300000 | 2.161583000  |
| H | 0.938796000  | -1.636218000 | 0.792937000  |
| O | 3.488176000  | 0.099960000  | -0.795676000 |
| H | 3.734872000  | 0.182393000  | -1.725419000 |
| H | 2.953717000  | 0.904409000  | -0.592585000 |
| F | 1.950593000  | 2.166041000  | -0.205630000 |
| H | 1.155471000  | 1.895700000  | 0.334029000  |
| F | 2.274380000  | -1.959686000 | -0.170465000 |
| H | 2.771900000  | -1.153339000 | -0.441654000 |
| F | -3.309236000 | -0.166559000 | -1.157525000 |
| H | -2.865025000 | -0.939428000 | -0.780837000 |

**(HF)<sub>4</sub>(H<sub>2</sub>O)<sub>4</sub>-B**

MP2/aug-cc-pVTZ = -706.8008463 a.u.

|   |              |              |              |
|---|--------------|--------------|--------------|
| O | -1.021890000 | -1.231651000 | 0.989840000  |
| H | -0.921760000 | -0.272863000 | 1.147108000  |
| H | -0.255715000 | -1.477249000 | 0.430864000  |
| O | -1.128368000 | 1.601355000  | 0.767532000  |
| H | -2.019466000 | 1.603994000  | 0.358145000  |
| H | -1.139757000 | 2.310630000  | 1.422965000  |
| O | 1.021856000  | 1.231661000  | -0.989775000 |
| H | 0.921720000  | 0.272874000  | -1.147039000 |
| H | 0.255693000  | 1.477265000  | -0.430786000 |
| O | 1.128331000  | -1.601344000 | -0.767469000 |
| H | 2.019439000  | -1.603986000 | -0.358102000 |
| H | 1.139704000  | -2.310618000 | -1.422904000 |
| F | -3.172764000 | -1.379901000 | -0.184461000 |
| H | -2.300252000 | -1.391540000 | 0.293792000  |
| F | -3.501180000 | 1.085510000  | -0.432927000 |
| H | -3.480761000 | 0.128258000  | -0.385738000 |
| F | 3.501173000  | -1.085506000 | 0.432933000  |
| H | 3.480756000  | -0.128254000 | 0.385743000  |
| F | 3.172760000  | 1.379906000  | 0.184472000  |
| H | 2.300236000  | 1.391548000  | -0.293758000 |

**(HF)<sub>5</sub>(H<sub>2</sub>O)<sub>3</sub>-B**

MP2/aug-cc-pVTZ = -730.8115173 a.u.

|   |              |              |              |
|---|--------------|--------------|--------------|
| O | 0.095387000  | 1.474049000  | 1.144559000  |
| H | -0.694161000 | 1.769639000  | 0.653061000  |
| H | -0.000400000 | 0.508469000  | 1.222912000  |
| O | 3.410595000  | -0.053568000 | -0.902092000 |
| H | 3.519693000  | 0.111431000  | -1.847339000 |
| H | 3.046595000  | 0.781126000  | -0.526285000 |
| O | -0.041882000 | -1.428694000 | 1.175810000  |
| H | 0.094728000  | -1.849929000 | 2.035740000  |
| H | 0.745748000  | -1.681602000 | 0.629752000  |
| F | 2.294533000  | 2.093807000  | 0.187359000  |
| H | 1.410233000  | 1.881125000  | 0.559804000  |
| F | 2.032904000  | -2.001000000 | -0.298474000 |
| H | 2.593555000  | -1.229130000 | -0.561733000 |
| F | -2.233660000 | -2.008603000 | 0.106771000  |
| H | -1.373262000 | -1.817550000 | 0.520997000  |
| F | -3.260369000 | -0.075558000 | -1.129185000 |
| H | -2.895634000 | -0.832874000 | -0.675336000 |
| F | -2.190649000 | 2.094193000  | -0.302994000 |
| H | -2.631929000 | 1.325803000  | -0.640265000 |

**(HF)<sub>6</sub>(H<sub>2</sub>O)<sub>2</sub>-B**

MP2/aug-cc-pVTZ = -754.8203833 a.u.

|   |              |              |              |
|---|--------------|--------------|--------------|
| O | -0.454251000 | -0.012865000 | -0.047916000 |
| H | -0.996294000 | -0.078371000 | 0.768420000  |
| H | 0.131219000  | -0.810261000 | -0.066094000 |
| O | 3.563389000  | -1.302840000 | 0.159858000  |
| H | 3.625955000  | -0.325852000 | 0.175796000  |
| H | 4.205801000  | -1.595791000 | -0.499181000 |
| F | 1.212562000  | -2.032373000 | -0.168814000 |
| H | 2.151378000  | -1.774979000 | -0.050630000 |
| F | 3.438751000  | 1.414831000  | 0.203233000  |
| H | 2.541738000  | 1.711343000  | 0.086024000  |
| F | 1.007598000  | 2.051939000  | -0.110965000 |
| H | 0.424870000  | 1.279068000  | -0.073361000 |
| F | -2.321085000 | 0.014394000  | -1.766620000 |
| H | -1.540473000 | -0.010025000 | -1.194575000 |
| F | -4.134033000 | -0.040316000 | -0.011853000 |
| H | -3.557401000 | -0.017022000 | -0.772608000 |
| F | -2.379099000 | -0.066720000 | 1.840008000  |
| H | -3.134284000 | -0.060015000 | 1.263244000  |

**(HF)<sub>7</sub>(H<sub>2</sub>O)<sub>1</sub>-B**

MP2/aug-cc-pVTZ = -778.8247594 a.u.

|   |              |              |              |
|---|--------------|--------------|--------------|
| O | 3.196935000  | 0.009471000  | -0.626657000 |
| H | 4.142750000  | 0.106068000  | -0.456166000 |
| H | 2.766117000  | 0.766749000  | -0.178205000 |
| F | 2.237199000  | -2.185667000 | -0.103334000 |
| H | 2.633723000  | -1.297422000 | -0.300060000 |
| F | 0.091223000  | -2.158872000 | 1.086680000  |
| H | 0.940734000  | -2.179274000 | 0.623813000  |
| F | -1.986734000 | -2.352685000 | -0.255246000 |
| H | -1.173263000 | -2.309609000 | 0.254225000  |
| F | -3.047120000 | -0.159259000 | -0.785993000 |
| H | -2.646645000 | -1.005822000 | -0.577989000 |
| F | -2.295670000 | 1.818223000  | 0.543929000  |
| H | -2.598123000 | 1.060333000  | 0.042514000  |
| F | -0.214275000 | 2.951519000  | -0.275964000 |
| H | -1.018082000 | 2.533306000  | 0.028913000  |
| F | 1.950851000  | 2.035446000  | 0.653140000  |
| H | 1.137132000  | 2.397246000  | 0.316639000  |

**Table S15:** Cartesian coordinates of linear non-cyclic N-C (HF)<sub>m</sub>(H<sub>2</sub>O)<sub>n</sub>, (m + n = 4 and 5) clusters optimized at MP2/aug-cc-pVDZ level of theory along with single point energy at MP2/aug-cc-pVTZ level

**NC-(HF)<sub>1</sub>(H<sub>2</sub>O)<sub>3</sub>**

**MP2/aug-cc-pVTZ = -329.3586702 a.u.**

|   |              |              |              |
|---|--------------|--------------|--------------|
| O | 3.856675000  | -0.396989000 | 0.072114000  |
| H | 2.955400000  | -0.031324000 | 0.066203000  |
| H | 4.211247000  | -0.122994000 | 0.927758000  |
| O | 1.265991000  | 0.833663000  | -0.067194000 |
| H | 0.468479000  | 0.283848000  | -0.046411000 |
| H | 1.219175000  | 1.280971000  | -0.924283000 |
| F | -1.174506000 | -0.649501000 | -0.218394000 |
| H | -2.067368000 | -0.377733000 | -0.039678000 |
| O | -3.633266000 | 0.061709000  | 0.225275000  |
| H | -4.286703000 | -0.096794000 | -0.449504000 |
| H | -3.844878000 | 0.922473000  | 0.589903000  |

**NC-(HF)<sub>1</sub>(H<sub>2</sub>O)<sub>4</sub>**

**MP2/aug-cc-pVTZ = -405.696311a.u.**

|   |              |              |             |
|---|--------------|--------------|-------------|
| O | 5.037884000  | -0.722349000 | 0.000000000 |
| H | 5.532429000  | -1.550837000 | 0.000000000 |
| H | 5.692371000  | -0.013667000 | 0.000000000 |
| F | 2.445925000  | -0.569018000 | 0.000000000 |
| H | 3.392888000  | -0.601698000 | 0.000000000 |
| O | -0.008987000 | 0.905682000  | 0.000000000 |
| H | 0.856017000  | 0.466287000  | 0.000000000 |
| H | 0.186945000  | 1.849517000  | 0.000000000 |
| O | -5.321464000 | 0.941924000  | 0.000000000 |
| H | -4.392297000 | 0.646680000  | 0.000000000 |
| H | -5.259882000 | 1.904288000  | 0.000000000 |
| O | -2.653328000 | -0.128182000 | 0.000000000 |
| H | -1.730350000 | 0.187013000  | 0.000000000 |
| H | -2.588793000 | -1.090057000 | 0.000000000 |

**NC-(HF)<sub>2</sub>(H<sub>2</sub>O)<sub>2</sub>**

**MP2/aug-cc-pVTZ = -353.3768061 a.u.**

|   |              |              |              |
|---|--------------|--------------|--------------|
| O | -3.727339000 | -0.358040000 | 0.000000000  |
| H | -4.454448000 | 0.274662000  | 0.000005000  |
| H | -4.129693000 | -1.234982000 | -0.000004000 |
| F | -1.196731000 | 0.217145000  | 0.000000000  |
| H | -2.122396000 | 0.019734000  | 0.000000000  |
| O | 1.593067000  | 0.812110000  | 0.000000000  |
| H | 0.646347000  | 0.602048000  | 0.000000000  |
| H | 1.650207000  | 1.774670000  | 0.000000000  |
| F | 3.702168000  | -0.757094000 | 0.000000000  |
| H | 2.935224000  | -0.209149000 | 0.000000000  |

**NC-(HF)<sub>2</sub>(H<sub>2</sub>O)<sub>3</sub>**

**MP2/aug-cc-pVTZ = -429.7182711 a.u.**

|   |              |              |              |
|---|--------------|--------------|--------------|
| O | 3.729237000  | 0.129634000  | -0.231531000 |
| H | 2.828407000  | -0.234258000 | -0.167955000 |
| H | 3.851002000  | 0.562433000  | 0.615641000  |
| F | 0.981386000  | -0.913186000 | 0.007265000  |
| H | 0.100599000  | -1.195321000 | 0.218607000  |
| O | -1.434485000 | -1.809258000 | -0.237656000 |
| H | -2.074760000 | -1.113374000 | 0.009680000  |
| H | -1.686112000 | -2.608488000 | -0.238238000 |
| F | -2.683925000 | 0.581859000  | -0.327270000 |
| H | -1.964318000 | 1.142964000  | -0.121907000 |
| O | -0.510110000 | 1.937663000  | 0.232990000  |
| H | 0.309048000  | 1.498565000  | 0.453531000  |
| H | -0.318150000 | 2.865109000  | 0.197751000  |

**NC-(HF)<sub>3</sub>(H<sub>2</sub>O)<sub>1</sub>**

**MP2/aug-cc-pVTZ = -377.3901312 a.u.**

|   |              |              |             |
|---|--------------|--------------|-------------|
| F | -0.215795000 | 3.481772000  | 0.000000000 |
| H | -0.407350000 | 2.565762000  | 0.000000000 |
| F | -0.739120000 | 0.868126000  | 0.000000000 |
| H | 0.000000000  | 0.274854000  | 0.000000000 |
| F | 1.115604000  | -0.889783000 | 0.000000000 |
| H | 0.683458000  | -1.743552000 | 0.000000000 |
| O | -0.112767000 | -3.125539000 | 0.000000000 |
| H | 0.253463000  | -4.017953000 | 0.000000000 |
| H | -1.073631000 | -3.215838000 | 0.000000000 |

**NC-(HF)<sub>3</sub>(H<sub>2</sub>O)<sub>2</sub>**

**MP2/aug-cc-pVTZ = -453.7155941 a.u.**

|   |              |              |              |
|---|--------------|--------------|--------------|
| F | 4.433449000  | -2.118952000 | 0.082096000  |
| H | 5.311160000  | -1.818761000 | 0.037140000  |
| F | 2.455019000  | -0.331094000 | -0.014282000 |
| H | 3.195529000  | -0.902426000 | 0.013941000  |
| O | 0.223080000  | 1.493099000  | -0.107547000 |
| H | 1.029202000  | 0.957381000  | -0.083740000 |
| H | 0.499541000  | 2.412234000  | -0.187858000 |
| F | -2.164132000 | 0.530472000  | 0.026450000  |
| H | -1.290495000 | 0.901981000  | -0.024130000 |
| O | -5.067119000 | 0.248985000  | 0.118070000  |
| H | -4.103958000 | 0.361235000  | 0.086159000  |
| H | -5.403237000 | 1.150992000  | 0.053701000  |

**NC-(HF)<sub>4</sub>(H<sub>2</sub>O)<sub>1</sub>**

**MP2/aug-cc-pVTZ = -477.727297 a.u.**

|   |              |              |             |
|---|--------------|--------------|-------------|
| O | -4.933988000 | 1.123185000  | 0.000000000 |
| H | -4.035966000 | 0.757724000  | 0.000000000 |
| H | -4.792521000 | 2.077576000  | 0.000000000 |
| F | -2.194194000 | -0.037384000 | 0.000000000 |
| H | -1.311956000 | 0.283887000  | 0.000000000 |
| F | 0.298832000  | 0.799523000  | 0.000000000 |
| H | 0.940452000  | 0.107960000  | 0.000000000 |
| F | 2.071884000  | -1.099655000 | 0.000000000 |
| H | 2.983882000  | -0.871069000 | 0.000000000 |
| F | 4.651537000  | -0.532935000 | 0.000000000 |
| H | 5.264619000  | -1.231028000 | 0.000000000 |
